# Supplementary material for: Genome-wide identification and expression profiling of the C2H2-type zinc finger protein genes in the silkworm Bombyx mori
Source: PeerJ. 2019 Jul 5;7:e7222. doi: 10.7717/peerj.7222 (PMC6613534; doi:10.7717/peerj.7222)
Supplement: Supplemental Information 6 — The microarray data of BmZNF genes and list of clustering genes. [file peerj-07-7222-s006.xlsx]

## Sheet: Tissue
gene	Ovary-Cy5-1	Ovary-Cy5-2	Ovary-cy5-3	Ovary-Cy3-4	Ovary-cy3-5	Ovary-cy3-6	Testis-Cy5-1	Testis-cy5-2	Testis-cy5-3	Testis-Cy3-4	Testis-cy3-5	Testis-cy3-6	Head-F-cy5-1	Head-F-cy3-2	Head-M-cy5-1	Head-M-cy3-2	Integument-F-cy5-1	Integument-F-cy3-2	Integument-M-CY5-1	Integument-M-cy3-2	Fat-F-cy5-1	Fat-F-cy3-2	Fat-M-cy5-3	Fat-M-cy3-4	Midgut-F-CY5-1	Midgut-F-cy3-2	Midgut-M-CY5-1	Midgut-M-cy3-2	Blood-F-CY5-1	Blood-F-cy3-2	Blood-M-CY5-1	Blood-M-cy3-2	Malpighian tubes-F-cy5-1	Malpighian tubes-F-CY5-2	Malpighian tubes-F-cy3-3	Malpighian tubes-F-cy3-4	Malpighian tubes-M-CY5-1	Malpighian tubes-M-cy5-2	Malpighian tubes-M-cy3-3	Malpighian tubes-M-cy3-4	AMSG-F-cy5-1	AMSG-F-cy5-2	AMSG-F-cy5-3	AMSG-F-cy3-4	AMSG-F-cy3-5	AMSG-F-cy3-6	AMSG-M-cy5-1	AMSG-M-cy5-2	AMSG-M-cy5-3
sw16280	58	299	227	70	376	247	305	482	454	365	727	607	76	88	94	163	25	72	79	66	25	42	11	61	147	80	47	130	155	64	1	104	66	51	310	57	129	215	105	66	175	-7	43	148	2	38	6	97	7
sw03845	12	18	8	32	7	124	8	10	84	37	0	35	47	63	40	251	34	7	34	106	8	14	23	146	36	226	135	155	28	91	47	36	206	4	123	49	60	65	201	53	104	56	35	100	190	38	81	43	33
sw14412	794	1099	938	832	1210	1037	4622	4796	3784	5533	6208	4359	557	324	383	682	320	287	339	378	168	192	173	239	322	443	504	266	277	247	354	328	281	177	338	157	406	395	399	246	200	136	370	313	214	394	332	391	229
sw22005	82	130	303	208	246	251	333	294	281	71	324	380	537	114	164	563	83	167	94	100	31	53	60	94	53	136	172	65	66	76	38	93	56	30	111	42	131	59	112	53	65	26	29	209	81	215	91	147	237
sw09507	67	76	143	113	121	161	66	150	137	64	189	138	77	-1	47	86	73	32	60	82	51	34	29	91	13	37	10	44	72	54	12	57	26	51	97	-11	41	67	82	34	39	1	55	35	-10	15	16	36	75
sw04067	2	77	51	22	83	55	42	249	149	71	351	154	69	29	94	94	29	9	30	80	22	30	4	43	36	27	10	71	91	6	12	69	34	12	69	-73	57	44	29	-1	-18	3	32	32	24	-8	16	-3	24
sw10367	387	741	783	413	938	776	352	614	610	572	928	925	313	214	124	347	143	139	184	197	117	202	92	215	85	83	-16	83	205	164	203	266	143	86	277	103	126	143	187	70	261	84	283	454	137	211	186	180	129
sw18384	-7	71	73	-20	70	100	-66	98	109	-28	183	114	29	-6	-10	86	76	56	158	273	86	89	72	211	11	78	-3	31	11	49	0	34	133	47	256	69	175	389	454	156	-11	-24	6	54	45	58	0	6	1
sw09878	60	60	89	56	78	106	278	301	269	476	447	420	48	44	91	147	38	52	42	88	20	40	24	95	17	120	0	86	36	122	33	60	29	21	169	65	21	137	142	78	67	30	25	64	145	81	71	34	62
sw15859	1292	2090	2066	1535	2757	2548	622	1215	939	746	1590	1107	686	733	751	818	517	592	812	823	639	865	577	831	389	362	589	510	460	190	209	544	60	168	388	415	387	376	155	272	601	135	766	735	213	194	650	679	281
sw21981	9	51	39	-49	61	36	-89	29	30	-54	60	50	13	30	36	36	8	16	-4	36	0	0	-11	11	28	103	16	29	17	6	2	11	-6	0	103	-49	10	14	68	-5	0	0	11	28	48	11	13	-9	3
sw12243	-22	111	100	15	124	82	150	437	473	70	702	601	-27	29	-3	-16	10	-43	-40	42	-5	-8	-6	16	15	-42	-64	20	-31	-53	-47	-17	14	25	77	-61	-8	16	27	-17	16	-26	93	40	4	-4	13	-14	3
sw14630	1399	2000	1123	1301	1696	989	4959	4865	2445	5874	7668	3600	594	429	667	637	387	257	375	494	218	341	300	288	213	430	426	239	421	359	529	524	340	129	363	146	368	459	504	190	435	366	612	428	487	641	666	494	674
sw01634	223	253	225	205	255	240	376	366	255	512	480	359	131	218	175	218	113	72	81	250	36	56	51	133	61	259	220	109	97	213	168	126	138	34	281	134	60	207	199	51	96	100	123	156	180	70	148	181	238
sw04508	22	11	37	49	18	99	9	16	47	107	61	128	77	129	62	177	44	138	75	135	40	71	59	173	175	357	281	222	21	121	23	69	180	77	226	188	35	95	235	190	137	87	51	265	181	58	101	219	36
sw05870	-23	1	5	17	11	20	26	27	18	-3	52	20	12	25	-3	47	5	9	17	55	7	0	-12	26	17	95	10	37	5	46	10	27	35	4	85	26	0	14	71	11	29	44	28	49	67	34	33	51	27
sw05430	12	52	78	43	78	84	34	55	92	36	162	87	124	92	153	201	116	63	107	220	71	87	55	130	68	148	142	67	43	106	39	53	79	51	136	23	96	107	90	36	56	38	56	37	73	86	44	50	100
sw03842	11	0	22	31	28	42	-14	-7	34	117	38	50	29	66	40	149	29	58	42	129	28	16	36	77	139	146	105	256	18	137	7	46	157	30	154	96	43	42	182	59	87	92	74	77	164	51	63	58	37
sw13239	44	184	140	105	234	164	602	491	564	632	621	690	132	54	40	220	121	72	83	129	46	42	42	61	78	57	77	88	67	67	126	98	29	12	47	3	60	29	54	-3	59	-10	26	130	71	72	49	67	30
sw14931	1256	1751	2038	1642	2236	2450	2180	2704	2820	2342	3373	3493	1558	1463	1546	1987	823	704	863	1126	810	849	563	907	964	581	565	1039	1024	945	1212	1491	860	613	815	672	846	715	960	604	1284	1254	1964	1604	1378	1440	1691	1428	1609
sw14296	948	1679	1930	1411	1685	2015	7068	5682	7609	4979	7267	8101	585	532	689	859	275	170	283	450	184	192	198	274	366	287	572	518	207	152	230	301	244	155	374	153	376	435	419	246	219	-4	260	229	62	152	233	280	148
sw13653	-75	67	40	-51	10	59	-63	131	169	-19	298	187	13	-25	58	15	20	-21	23	92	17	13	16	67	-57	-30	-67	18	-1	-36	16	8	1	-17	120	-26	32	48	13	-17	-26	-69	-5	-19	-31	19	-20	0	9
sw15841	124	145	133	163	168	87	51	164	62	61	263	97	86	23	14	157	134	43	40	241	86	121	108	142	19	37	77	44	29	14	14	30	77	30	210	38	71	126	65	5	56	9	99	103	76	127	50	44	86
sw01974	64	160	79	80	191	73	70	102	48	76	188	146	88	100	91	125	55	90	79	154	27	26	12	111	34	1634	389	71	76	69	35	80	113	69	225	103	49	182	242	62	169	97	24	171	144	123	79	153	72
sw15858	264	428	416	227	426	354	26	171	137	25	289	167	93	47	62	119	89	76	70	248	38	209	107	84	-7	15	3	52	27	38	7	46	28	21	118	69	30	59	117	19	75	-11	45	142	35	109	48	125	60
sw18667	-15	28	36	-10	30	29	-60	19	2	-47	56	17	16	5	-3	79	2	-30	-21	72	-12	-3	-20	12	3	40	16	29	-11	-33	11	16	20	12	100	15	38	40	43	-15	31	-3	44	48	19	29	-2	-8	-3
sw19719	2713	3002	3025	2807	3154	2609	4153	3439	3113	4382	5072	4497	981	1016	1170	1484	692	759	996	796	540	627	481	654	341	239	240	463	638	495	559	869	546	0	662	576	813	617	632	41	785	867	1003	1018	1088	760	998	1122	744
sw07491	6	194	125	25	219	172	68	267	216	25	449	152	63	44	102	59	46	45	75	144	29	58	27	132	7	22	-20	23	49	21	15	70	3	17	180	30	71	116	65	-13	-44	62	124	69	89	45	94	45	18
sw13029	115	216	178	49	206	156	70	168	261	143	261	243	181	104	178	194	134	29	128	212	51	60	52	16	45	88	111	117	80	18	40	56	56	95	138	111	104	158	65	62	67	30	32	54	33	52	39	36	33
sw05609	650	807	489	558	734	429	853	958	506	826	1411	595	276	363	408	416	410	370	197	356	153	269	173	192	504	498	376	392	276	310	280	283	432	250	536	276	354	507	457	211	268	398	477	300	414	344	265	286	148
sw05990	80	64	80	74	92	63	-43	23	18	-15	32	19	35	88	145	64	35	59	36	79	77	92	79	143	59	80	-23	56	41	13	11	62	24	30	179	15	60	67	119	103	80	4	56	118	41	111	33	141	21
sw02100	41	7	66	31	45	69	19	16	89	50	81	90	17	46	32	73	32	70	34	95	7	12	-2	105	38	115	60	113	10	61	16	18	77	30	75	7	30	31	217	5	30	44	32	34	134	22	52	70	25
sw01586	512	413	393	420	402	323	6606	6479	3786	8040	8985	5157	208	209	266	255	161	74	118	195	56	101	79	158	116	161	135	157	102	187	118	154	242	73	274	123	93	196	280	40	151	186	214	139	202	161	192	157	79
sw15845	57	145	174	18	155	137	-25	104	99	29	201	101	84	59	69	130	47	32	77	103	21	37	30	54	9	22	6	12	18	18	11	30	23	8	87	-34	115	69	51	24	29	4	14	48	20	65	25	44	-1
sw17253	1168	595	1369	1518	835	1514	8272	3286	6107	8887	4306	7489	593	899	696	714	347	544	625	580	284	495	490	481	687	632	657	717	710	439	339	761	462	488	573	515	508	364	432	522	1136	259	697	1546	337	626	688	1182	908
sw22304	25	198	181	49	209	174	452	531	500	309	787	593	114	32	138	151	137	47	49	284	53	86	59	63	22	85	54	46	47	3	15	74	1498	0	144	1668	60	196	43	41	67	-7	48	70	21	130	10	49	132
sw14700	-70	16	9	-79	21	17	-179	23	64	-188	66	11	1	-39	3	-6	4	-32	-12	76	8	-3	10	29	-34	-50	-10	-58	-28	-21	-5	-24	-12	-21	50	-3	38	2	8	-30	-29	-30	-17	-5	-13	25	-11	-5	28
sw10735	8	185	158	48	181	131	69	246	207	15	317	189	139	32	21	113	37	19	15	69	28	18	27	-7	26	-22	-71	18	36	21	51	43	24	25	156	38	65	103	82	47	0	3	33	8	10	-6	18	19	22
sw12313	1022	626	917	896	651	750	492	477	317	856	899	523	452	532	507	850	606	419	339	507	127	262	171	164	324	448	311	333	497	593	500	508	373	142	567	230	381	429	536	169	363	168	453	337	174	658	231	441	480
sw07023	1083	816	832	1009	860	808	2554	2365	1354	2593	2979	1378	454	568	937	674	350	256	305	378	194	231	243	303	271	405	386	333	287	225	260	370	350	220	386	203	310	349	382	223	142	386	433	213	371	323	348	322	241
sw07972	45	113	140	51	136	163	-18	82	117	46	134	121	165	203	186	189	125	58	143	244	63	70	52	175	7	37	57	27	67	16	43	95	94	43	147	3	63	69	179	5	30	20	31	62	104	105	67	49	47
sw20191	1900	1435	1841	1776	1544	1833	2288	1620	2034	2541	2250	2685	851	868	973	1033	507	664	794	633	528	618	515	582	489	551	453	491	305	247	318	491	627	851	1137	726	857	842	558	730	896	1355	1638	932	1459	974	925	1481	951
sw03680	50	111	82	37	143	140	25	128	163	103	222	146	39	54	25	98	38	23	-2	111	11	33	15	46	189	153	98	216	94	51	26	104	17	4	212	15	41	67	95	49	13	-8	1	71	71	20	10	15	10
sw13510	200	548	543	386	514	813	414	642	1019	366	1030	917	751	1206	1389	932	803	761	711	868	516	1003	719	586	307	1030	826	302	494	611	630	473	497	324	766	388	516	668	468	265	431	303	388	338	447	409	360	264	278
sw06538	1787	3608	1942	2036	3455	1899	1666	2773	1377	1582	3354	1139	1416	1427	1962	1500	1099	726	837	1325	432	586	584	478	582	798	792	591	907	916	1022	1185	802	419	802	457	728	922	929	465	1068	1603	1644	1202	1371	679	1486	1330	635
sw09078	93	118	83	18	85	112	119	214	169	228	384	151	40	11	58	84	79	36	53	104	52	89	64	97	5	35	27	-8	7	-19	-12	26	-3	12	57	-49	60	21	4	-3	4	-24	-5	-1	27	16	10	-4	-6
sw13087	340	245	437	270	233	451	3008	2135	2849	4297	2705	2910	262	160	218	301	131	74	70	209	117	115	95	142	168	120	135	199	130	34	144	154	236	138	348	146	112	169	260	125	178	92	240	254	114	245	158	209	214
sw07636	375	363	383	382	431	402	815	793	763	744	1025	695	1237	1844	2028	1211	167	165	225	265	89	99	114	281	160	17	-23	174	2800	2777	2406	2058	157	151	175	134	222	160	241	185	71	114	215	79	150	175	98	58	340
sw06411	571	773	642	548	647	890	2372	2121	2869	2001	2699	2055	226	295	499	289	140	114	161	242	92	79	99	187	55	88	71	102	139	116	126	270	82	69	289	88	120	241	161	38	102	141	255	229	147	233	305	272	109
sw14441	1767	2612	2074	1866	2737	1858	3114	2620	1983	2942	3764	2338	1218	907	1440	1542	697	813	1014	845	462	732	516	537	886	2009	1765	768	909	921	1049	872	1011	544	1391	630	1112	1790	1214	688	883	497	656	560	542	1010	549	550	1148
sw05306	949	1217	602	808	963	519	11491	7455	2715	14749	13062	4712	1914	1272	1535	2160	1637	819	1050	2071	628	776	653	816	1428	2057	2208	1630	1337	1550	1325	1155	844	285	1244	415	516	1123	1043	312	950	765	1115	1290	789	922	904	806	694
sw14970	379	521	295	317	514	384	469	700	399	516	1068	458	776	603	919	1050	664	506	829	837	144	199	169	171	437	642	772	390	546	519	665	606	505	302	748	280	527	753	493	299	237	238	260	154	337	427	183	303	341
sw17775	-64	7	2	-93	19	178	-185	24	52	-143	18	8	9	6	-3	18	-1	-7	10	13	-4	4	-20	2	-74	-7	-27	-8	-15	11	-6	-5	4	4	101	49	2	40	39	-19	-9	-21	-46	38	-1	-5	-18	-34	1
sw09847	617	382	408	413	410	188	931	565	360	1404	721	869	209	138	262	284	133	98	156	181	54	72	89	140	64	118	71	161	84	112	125	154	150	30	180	130	189	182	228	87	59	103	137	136	118	215	177	228	98
sw11736	57	233	271	132	240	252	235	298	361	162	395	477	277	105	138	365	110	65	85	214	64	72	104	180	80	176	47	27	126	197	129	108	10	12	87	-69	63	152	114	49	153	8	95	118	31	45	56	96	82
sw05335	244	293	361	299	327	420	384	411	429	405	597	408	117	203	233	217	98	70	109	192	37	49	32	101	53	98	13	121	77	49	62	136	129	30	133	7	192	150	178	83	104	85	78	105	99	61	113	141	42
sw06077	311	217	260	289	218	168	289	212	178	473	279	364	93	71	102	174	86	19	34	173	33	41	33	81	21	50	44	73	55	86	48	95	56	30	106	-7	41	122	101	40	43	130	109	158	136	138	88	188	10
sw00108	-32	10	2	-10	22	16	-25	22	59	1	104	85	-5	51	40	60	7	41	-25	91	4	6	-25	83	17	85	3	109	-12	51	-11	24	4	4	108	96	0	16	87	47	18	-7	7	46	55	23	5	-21	-15
sw07820	66	27	55	48	70	82	31	86	63	134	126	79	89	22	76	157	85	145	161	195	26	100	43	78	74	78	77	111	41	112	57	82	101	47	72	-3	52	80	127	64	114	47	55	237	138	198	77	188	316
sw07658	583	1100	538	511	1146	594	183	250	259	127	442	350	191	254	361	255	119	105	92	170	16	83	19	87	185	307	254	304	87	114	47	94	91	99	274	11	57	137	188	104	96	-5	49	57	34	47	13	-6	10
sw03555	52	167	167	134	171	188	173	236	168	203	319	158	110	218	244	207	188	172	118	254	54	89	78	53	181	309	271	193	166	175	117	141	140	120	253	211	346	220	286	259	79	133	122	161	177	265	95	152	156
sw09559	139	96	66	94	78	41	420	373	192	596	519	225	25	40	72	60	11	5	17	48	10	9	-6	5	30	47	-44	77	17	29	10	21	15	8	97	-57	60	42	92	41	45	33	27	45	101	38	37	72	6
sw16606	28	163	46	12	175	76	13	241	86	-81	321	29	266	52	94	329	441	346	603	560	48	86	101	128	57	294	413	128	47	66	106	41	99	17	198	-30	98	249	148	41	31	5	53	40	0	109	19	36	126
sw05598	31	27	40	37	42	49	2	29	56	79	77	121	57	64	91	95	65	25	45	123	26	70	47	30	68	178	94	117	23	102	21	12	107	38	105	34	54	71	129	70	153	100	79	118	138	66	105	235	3
sw11206	-2	27	13	12	11	37	26	-2	69	-34	57	43	23	10	51	21	34	-16	6	35	14	16	8	47	1	22	40	-50	27	-16	23	6	32	21	67	-26	57	19	27	-30	-7	8	15	10	1	20	11	24	-1
sw02620	212	232	157	211	261	185	24	162	104	129	229	161	194	267	361	347	252	279	397	345	86	70	65	209	148	256	186	140	33	53	39	49	59	34	87	65	63	84	106	55	80	7	40	50	86	48	51	35	106
sw06268	22	30	34	24	43	66	86	64	147	100	108	124	10	15	76	88	20	14	36	76	16	14	12	57	13	32	44	62	17	77	17	24	99	12	88	42	30	29	126	34	80	43	60	69	116	-5	61	50	182
sw07669	1978	1338	1596	1594	1302	1827	1296	993	1142	2122	1622	1269	655	788	777	973	285	292	401	530	209	291	271	467	303	297	125	400	594	215	209	809	469	203	623	299	392	442	552	234	606	516	537	774	420	483	786	726	600
sw08630	203	501	260	179	554	251	201	556	277	326	1015	340	171	155	164	240	88	65	55	189	64	105	47	109	34	17	-16	71	103	74	61	156	52	38	213	46	120	118	162	91	115	103	102	205	193	76	179	140	79
sw14178	101	88	101	37	100	87	336	166	104	224	191	255	107	63	58	119	70	61	98	47	35	63	39	102	34	37	152	77	36	54	39	31	135	60	87	65	151	93	193	24	109	129	57	166	114	119	91	168	98
sw02275	5	4	16	43	19	40	128	19	22	71	63	54	31	40	43	91	44	9	8	113	14	30	21	73	43	120	33	83	29	104	25	49	87	12	243	53	27	118	113	15	43	79	25	222	97	30	50	72	50
sw04651	0	35	26	12	34	15	46	79	65	75	81	59	12	29	18	45	25	10	4	32	5	21	17	7	110	68	54	88	22	6	2	29	21	12	55	11	60	44	56	-1	31	15	39	50	99	8	33	46	-27
sw02351	127	65	100	113	110	123	125	94	100	337	116	168	73	121	91	155	29	116	58	119	23	39	29	111	17	188	37	69	69	126	57	81	102	51	241	76	46	110	188	104	89	140	106	215	204	130	129	170	132
sw12341	41	209	132	22	204	139	-102	92	103	-20	243	162	50	29	7	105	25	-23	12	67	3	22	23	29	-1	-17	-40	-23	49	0	5	38	3	25	64	-46	49	74	70	32	21	-30	35	113	-9	262	21	153	42
sw06571	1752	2119	1737	1647	2276	1644	1418	1660	1125	1431	2000	1291	763	928	1065	873	682	399	509	712	290	337	329	469	404	430	433	493	383	406	582	641	882	492	958	545	692	867	1089	564	629	2249	1393	910	1954	1060	1539	1028	831
sw11409	28	293	90	3	297	105	-68	86	75	31	191	61	98	136	116	231	384	532	322	624	61	116	131	240	49	100	60	161	119	114	57	142	12	12	236	1030	115	86	150	34	59	-5	36	31	75	56	7	20	13
sw06234	802	745	1006	868	844	1020	1976	2879	1885	1693	3557	1699	388	283	518	404	245	132	98	282	224	285	187	332	227	329	179	291	299	268	272	368	150	95	264	99	192	154	274	87	233	109	362	323	189	265	315	328	273
sw07850	61	158	83	51	154	81	-72	9	86	-11	44	65	163	153	237	246	208	119	146	275	42	84	53	115	24	95	-30	25	11	0	-3	42	149	86	284	99	71	124	131	51	22	-58	-3	6	-2	-5	-1	-9	18
sw10738	754	1449	850	708	1242	927	804	1448	1033	783	1874	849	584	513	922	728	425	374	571	494	248	336	335	330	446	596	586	354	470	399	489	493	420	254	537	357	656	814	676	320	387	293	413	321	334	507	421	369	607
sw06109	1464	1390	1787	1738	1611	1884	2404	2276	2432	2689	3164	2427	517	634	736	1079	273	227	294	528	92	189	129	194	127	156	121	203	394	300	330	501	155	95	422	107	195	359	317	133	218	182	434	332	218	270	375	375	215
sw05801	11	99	62	12	105	22	-41	126	69	-48	165	50	28	61	58	44	34	-16	21	58	20	15	14	97	17	20	33	33	54	34	28	64	-21	-4	133	-23	8	55	11	-17	226	-8	17	86	29	8	16	122	10
sw08858	20	85	47	20	86	110	-18	132	123	-7	270	90	187	105	186	196	32	47	49	36	14	28	19	49	215	390	426	264	14	41	23	36	73	17	136	-80	76	131	106	24	23	2	43	77	9	33	30	16	9
sw22207	398	666	627	270	824	576	333	909	645	527	1021	727	882	455	550	925	399	415	582	608	154	225	174	184	257	433	403	270	190	49	57	200	185	51	258	192	434	328	297	135	360	84	300	461	381	300	303	408	226
sw05331	353	230	514	339	221	643	333	220	450	470	312	511	188	337	404	256	158	199	333	310	141	212	155	233	101	249	220	203	103	97	111	157	163	77	226	134	241	247	276	146	180	97	97	185	178	165	147	185	202
sw04431	34	27	30	41	34	61	18	36	78	86	36	68	62	95	76	91	41	79	51	82	24	27	22	9	40	90	71	83	19	74	16	28	70	8	143	7	35	61	93	26	105	34	43	53	51	27	33	37	34
sw06024	343	559	469	510	565	497	4188	3372	3712	3739	4294	2995	176	243	342	220	112	72	109	209	59	115	48	143	80	211	108	117	219	164	130	181	108	47	243	115	126	146	166	78	51	55	125	85	108	312	115	111	92
sw11798	61	200	149	84	169	133	178	306	271	139	468	267	120	95	134	108	68	-1	58	86	22	35	32	63	-17	30	-23	12	62	102	66	112	40	30	75	-46	118	82	124	30	45	12	45	58	37	48	57	59	97
sw12128	-45	12	4	-15	-3	40	-42	0	34	-38	42	28	37	1	21	23	17	-29	-12	63	26	10	2	40	-24	32	-33	-27	-20	-3	-8	12	-3	21	46	-61	13	25	22	1	-11	-5	10	-10	21	-5	-2	19	-44
sw00770	572	1192	557	653	1285	826	392	608	509	525	882	419	321	375	470	405	208	227	244	331	76	157	181	78	508	692	684	512	138	288	228	159	150	69	235	165	90	154	211	47	207	97	116	135	156	262	94	93	171
sw12336	982	1205	1295	925	1024	1059	1829	2185	1727	1691	2262	2049	1377	296	572	1515	1282	1480	2303	1414	778	871	856	1021	2297	2871	3486	2006	1261	1382	1471	1065	946	1132	1078	830	1810	1671	1297	1322	937	604	1031	678	681	1200	783	824	1031
sw00777	159	150	174	158	197	206	233	215	226	451	272	283	391	262	306	571	191	108	137	472	98	137	111	189	361	468	281	398	-9	313	235	-4	275	51	304	188	87	224	354	108	225	136	164	257	168	208	135	167	214
sw13930	1851	2501	2075	1938	2405	1698	1964	2014	1585	2413	3056	2056	795	779	689	928	513	330	393	684	262	365	251	339	450	445	237	306	305	315	423	514	424	267	534	392	609	512	627	333	540	939	1079	732	1190	811	910	710	612
sw02196	754	845	750	894	885	811	709	618	668	827	716	557	248	409	496	332	227	196	206	344	130	170	141	291	221	143	98	302	178	200	156	303	332	146	415	53	181	378	368	177	255	646	537	373	708	383	767	477	404
sw01287	44	-3	20	101	38	58	193	-15	45	118	-9	57	101	71	32	265	23	56	42	160	26	52	17	73	51	249	54	157	39	203	60	73	351	77	128	96	13	42	350	127	249	100	2	182	84	33	20	140	42
sw09990	624	872	674	747	828	616	467	655	392	414	863	415	140	204	328	254	46	10	79	126	19	35	36	54	51	45	-13	60	105	89	141	203	79	38	235	57	145	179	203	74	50	66	165	157	89	72	149	226	71
sw10788	52	165	168	60	184	178	6	123	179	66	136	202	124	34	62	141	113	148	143	163	27	29	5	56	47	55	67	58	17	43	39	37	32	17	80	49	57	65	44	34	33	28	-21	10	24	69	21	22	12
sw20816	1966	2364	2304	2105	2652	2675	2484	2615	2188	2763	3438	2867	987	1400	1170	1443	592	844	960	834	804	830	564	862	848	1138	819	1106	726	570	643	1191	555	661	905	507	700	1113	1062	1207	1146	1049	1199	1412	1256	832	1163	1140	680
sw08711	-65	28	18	-25	45	73	32	256	210	-61	225	188	17	15	10	34	10	18	8	58	7	0	-17	29	45	45	-20	77	-9	-6	-5	5	-6	12	103	-30	43	44	41	-17	-3	-37	30	27	39	19	-7	-10	18
sw09849	-3	34	36	-37	57	22	-18	84	44	8	40	42	20	20	10	19	4	-1	-10	36	18	10	16	59	-9	-10	13	52	1	-6	23	0	26	12	72	-42	82	29	48	17	22	32	13	45	44	16	30	28	4
sw08394	222	298	241	227	327	233	821	881	730	1172	1389	809	454	590	955	745	329	188	311	516	78	66	53	149	404	342	254	396	146	109	113	161	244	120	264	65	184	230	513	162	83	62	177	254	76	140	139	194	120
sw13928	34	119	163	20	125	164	299	395	685	336	522	656	57	1	54	84	34	0	10	88	29	81	71	63	-5	-7	10	8	15	1	-12	7	-15	17	44	-73	52	23	28	-3	32	-24	-3	66	-26	43	8	53	60
sw08208	121	254	218	79	330	274	97	300	310	103	373	327	201	138	200	287	121	32	83	169	79	69	60	233	433	231	155	365	209	164	141	224	160	82	284	61	241	287	328	95	57	8	80	120	51	88	47	84	71
sw02010	33	-4	18	5	32	15	-26	40	26	59	50	28	15	27	40	77	10	9	4	54	-5	-7	9	-5	19	83	44	44	6	6	21	29	90	12	88	-3	27	14	103	-5	40	9	38	49	68	37	20	40	12
sw11797	18	37	62	24	42	22	-19	17	20	-1	25	70	71	35	80	146	38	-49	53	50	17	27	33	29	9	68	47	62	18	28	25	20	138	60	149	-88	123	139	223	24	51	105	73	143	127	45	138	199	28
sw02064	-30	44	36	-5	44	27	-21	59	75	-34	84	23	35	37	32	43	77	45	92	463	33	50	48	115	9	136	145	27	3	51	-12	18	88	30	138	23	60	61	141	24	-21	-10	0	-1	32	50	12	10	34
sw15107	-41	14	18	-31	8	24	-85	0	18	-71	10	10	15	34	69	19	19	-19	-6	35	8	0	0	26	-7	2	30	-6	5	-4	-5	3	0	-4	42	-49	-10	33	38	-5	3	5	-4	2	25	-4	10	-7	-6
sw18675	542	748	464	479	919	523	476	658	453	781	920	541	4598	5092	448	1051	869	937	545	638	267	1139	2022	3560	506	931	589	403	378	247	255	574	2880	2277	3471	3398	541	590	538	333	1906	1439	2766	2158	1637	2066	1156	1417	1265
sw14268	1013	805	828	984	853	827	1408	1034	936	1885	1439	1203	431	286	386	539	176	63	167	253	101	116	125	204	110	80	101	123	125	84	81	216	126	60	131	88	142	198	209	148	227	205	258	300	242	240	402	375	223
sw03214	36	162	105	79	182	325	396	590	502	311	705	379	432	436	795	654	214	208	268	338	41	95	90	119	93	299	433	62	72	97	97	64	160	30	226	115	167	217	272	43	193	98	153	130	125	223	176	168	168
sw01724	33	16	20	60	36	33	41	29	43	117	60	69	16	37	0	97	20	54	53	88	13	30	0	71	55	193	23	119	21	84	21	48	175	30	159	73	13	69	228	15	106	99	27	73	159	270	88	64	19
sw02942	238	310	543	351	295	485	499	399	673	384	573	855	466	646	893	581	330	559	706	544	238	411	323	343	259	413	508	342	294	414	392	281	266	133	427	203	368	404	311	211	267	134	306	285	207	320	211	248	189
sw19768	300	405	375	396	530	337	234	399	171	185	488	306	160	172	226	227	148	216	195	242	49	54	25	53	865	1145	1094	799	181	91	44	199	77	82	225	76	178	177	166	108	133	130	199	156	170	58	101	217	39
sw09049	646	978	688	691	1037	819	1261	2083	1392	1021	2434	1318	3156	3052	5191	3933	2265	3300	2694	2047	320	772	1013	737	1505	5062	5051	1041	879	1056	985	673	857	665	1164	903	1348	1595	1109	774	459	445	583	355	499	704	484	457	562
sw08644	15	43	48	13	59	82	-36	50	96	8	96	95	46	22	65	60	19	-39	8	83	20	18	2	108	-30	68	-13	6	7	29	29	49	3	4	101	-46	32	38	58	-36	25	-18	-9	49	32	30	20	1	-16
sw03497	396	551	301	432	641	176	356	472	123	433	690	310	334	383	499	408	234	214	232	232	54	151	159	-5	324	465	379	272	239	228	221	258	233	151	335	165	274	315	327	196	146	197	234	275	205	188	133	220	139
sw19525	805	993	730	878	1046	809	2435	2330	1726	3130	3492	2418	870	535	740	1361	661	463	661	814	246	404	310	312	286	795	728	287	285	328	319	299	314	181	473	146	401	546	431	152	377	177	333	426	245	497	268	385	335
sw22610	2525	3784	2234	2116	3796	2405	2486	3886	1951	3381	5974	2581	1539	1028	1382	2288	1299	955	1338	1582	760	1172	865	914	1461	1440	1351	1383	1120	749	887	1527	886	596	1471	668	1758	2512	1812	1246	1848	807	1525	2003	1004	1147	1600	1762	1262
sw15735	3498	5681	3272	3332	5557	3127	2296	3710	1970	2606	5185	2418	2387	853	1192	2608	1611	1324	1808	1837	930	890	611	913	1786	1997	1924	1866	1845	1751	2100	2297	700	505	835	557	994	1047	966	690	3481	1139	2826	3671	1390	1868	1788	2515	1313
sw12886	1618	1664	1618	1687	1514	1370	1820	1425	1674	2074	2108	2057	899	820	1050	851	637	346	562	771	527	656	497	630	811	821	884	822	406	459	634	637	580	337	651	361	695	681	870	477	1045	1510	1955	1245	1674	1254	1325	1233	1151
sw06441	103	143	200	68	138	72	105	143	128	258	255	427	76	81	32	128	26	14	58	67	21	44	25	83	76	103	71	94	71	56	40	62	43	34	205	42	35	152	88	28	88	64	49	160	37	97	47	120	72
sw12060	1758	1897	1481	1706	2219	1625	2427	2948	1875	2599	3565	2291	3077	404	685	3985	2388	1761	2410	3376	867	1029	871	1335	1132	2976	3011	910	1234	1557	1308	1160	998	687	1308	903	1505	1745	1781	984	815	468	804	814	522	1311	567	661	1045
sw15370	1535	2214	2172	2300	2599	2200	2732	3175	2291	2077	4278	2443	1201	1463	1875	1364	1195	762	1007	1562	320	575	464	533	393	609	528	449	388	391	597	659	759	401	869	607	761	821	1049	536	469	756	1080	554	888	737	912	737	569
sw11783	664	843	1065	823	1019	1108	745	952	907	614	1151	965	412	603	835	582	297	176	264	372	190	199	174	216	231	153	199	251	118	119	167	240	388	237	517	222	521	793	640	282	303	107	430	540	152	308	437	366	238
sw11439	41	69	138	44	49	127	75	129	203	81	225	201	148	-27	3	210	107	69	103	133	40	50	50	61	61	153	77	48	100	142	156	136	102	56	82	3	112	95	158	66	83	25	38	70	68	169	38	55	45
sw05886	-8	84	98	53	94	75	21	216	102	21	324	119	105	87	94	157	5	-7	2	75	21	10	36	59	61	105	-10	90	58	43	26	99	180	125	453	192	230	245	265	99	216	-21	102	246	67	41	88	163	48
sw21173	244	319	366	351	433	404	478	422	396	422	567	557	380	51	29	468	288	319	401	398	205	350	284	247	341	662	714	281	177	179	148	191	127	116	101	199	373	118	197	179	230	91	135	165	104	222	121	108	186
sw21132	57	66	140	72	84	138	393	185	440	539	349	673	105	75	54	126	58	72	23	176	43	61	41	83	-17	75	20	58	14	28	8	74	56	43	156	11	82	97	130	251	81	73	45	97	127	102	84	86	85
sw01559	272	254	380	255	283	429	183	212	333	293	288	295	83	252	240	131	91	67	79	176	40	49	41	94	64	115	44	113	44	112	60	87	211	125	164	80	85	143	337	70	94	94	197	162	165	151	157	243	179
sw00398	22	19	22	18	55	24	48	33	32	115	58	93	42	68	32	126	20	54	25	151	20	25	17	84	101	239	74	184	19	101	43	42	57	30	129	34	93	40	92	-1	110	73	63	38	121	45	40	36	21
sw00778	369	1457	747	560	1488	891	407	552	458	344	678	535	617	989	1243	790	448	470	629	734	896	1508	1625	1606	185	423	413	314	1334	1295	993	1194	236	177	253	207	285	220	354	181	251	98	121	131	130	241	93	162	127
sw00362	204	98	164	201	134	194	221	93	149	382	194	266	160	126	145	315	121	99	150	262	55	101	84	87	42	178	81	102	65	205	103	91	214	77	411	169	109	292	271	101	152	193	84	277	242	212	160	287	-101
sw15283	420	769	493	436	739	583	995	1354	1277	1435	1775	1448	369	373	525	587	221	314	444	315	263	255	132	204	271	236	115	274	309	242	269	324	135	142	271	257	307	211	199	164	332	-37	307	380	3	263	121	188	25
sw12051	-40	15	26	15	12	33	24	31	46	-28	34	97	39	10	83	62	19	0	58	39	8	46	5	40	5	-5	30	6	1	-9	31	18	32	8	80	23	27	44	28	-26	-31	-4	0	-9	-5	41	0	36	36
sw22428	17	45	44	12	34	43	6	53	37	25	67	67	86	93	124	197	79	63	66	312	36	62	23	59	38	55	81	65	36	29	28	67	56	99	147	42	137	209	156	66	104	58	120	102	111	80	75	139	79
sw05685	50	27	37	12	32	136	26	40	107	45	107	74	20	39	65	62	20	3	0	72	16	74	43	5	78	103	50	39	19	36	21	21	38	21	121	-38	30	31	76	9	18	54	25	17	49	36	40	60	13
sw04416	194	242	316	299	277	346	1553	869	1331	1331	1074	1657	980	1088	1156	958	330	325	476	621	146	235	200	174	317	629	416	405	201	358	244	233	200	164	310	219	326	317	346	219	221	92	205	259	164	229	184	170	220
sw09854	1249	1268	1055	1056	1021	891	1267	1039	812	1667	1728	1132	678	677	704	659	637	317	382	590	451	524	371	353	105	146	37	128	663	684	661	666	267	120	358	211	241	347	394	110	530	182	414	546	253	508	406	380	465
sw00101	-38	2	57	-17	15	104	-10	43	55	8	95	145	2	64	0	68	10	-27	4	57	3	-1	2	54	-15	55	-16	12	14	58	10	20	-7	4	115	19	41	16	60	41	13	-1	10	43	59	4	8	18	30
sw03350	178	111	217	143	138	324	183	322	413	382	432	361	141	216	248	192	103	174	143	265	64	83	78	135	26	100	33	107	28	111	75	76	189	56	244	92	82	173	325	45	215	225	120	282	241	77	184	324	72
sw12065	2153	1670	1872	1973	1609	1715	453	439	348	705	848	409	329	416	383	411	2119	1416	1576	2174	1161	2010	1785	1878	1207	1110	291	486	1474	1681	2367	2497	12872	7583	14944	8402	4008	6016	5637	3104	2393	3399	2346	2476	3122	2978	2210	2562	2253
sw10737	165	312	171	172	312	190	262	396	309	172	540	318	56	52	65	50	163	21	38	736	17	13	21	21	-5	7	-37	-71	10	9	25	60	38	30	139	-34	30	42	64	5	30	26	74	49	65	37	54	32	197
sw14475	6	45	104	27	46	120	-40	49	78	-94	94	80	35	73	145	32	55	-5	2	72	79	163	133	88	72	113	118	62	50	24	56	55	24	8	141	-15	57	80	57	13	67	6	90	62	58	193	52	71	182
sw03756	-3	-6	4	-3	3	13	-51	19	16	0	48	66	13	69	47	96	5	43	17	54	1	26	7	244	22	161	0	58	21	96	15	49	80	17	151	80	8	29	212	55	17	5	26	62	80	45	11	19	19
sw13066	688	445	589	668	437	673	2157	1266	2024	3110	1718	1999	188	342	273	265	200	141	150	188	79	133	121	112	127	73	132	138	116	99	122	145	160	56	218	46	145	162	227	68	233	271	266	223	204	311	227	249	205
sw20252	103	141	245	98	151	187	333	385	399	446	549	469	63	145	51	108	25	69	10	159	18	44	35	108	49	136	37	81	66	106	31	104	48	8	318	99	27	122	132	59	96	13	26	122	76	81	50	69	62
sw07599	63	156	105	84	167	116	373	477	296	365	684	357	1184	2325	620	366	308	265	208	307	116	327	703	993	139	443	247	125	57	130	104	98	609	682	1157	841	109	237	207	87	346	186	243	285	203	252	154	136	153
sw13850	309	370	373	291	292	338	525	526	467	577	622	491	197	148	288	198	155	63	223	188	113	137	120	158	63	156	145	31	162	164	172	133	94	73	134	38	118	139	112	68	137	33	78	64	47	79	34	81	100
sw10956	28	67	64	39	75	126	44	101	147	100	160	99	197	83	94	274	122	90	146	216	44	69	51	40	21	193	223	73	77	134	80	70	45	38	87	11	79	86	101	28	29	29	10	57	14	106	17	17	63
sw12607	4536	4056	3836	4292	4558	3640	5688	4976	3347	7007	7177	4673	5625	2473	2998	6025	7544	6174	7109	7307	2616	3284	2316	3167	5778	6971	6121	4141	3560	4075	4953	4578	3683	2838	4372	3478	5491	6004	5737	4031	3227	2637	4323	3455	3164	4604	2974	2835	3363
sw13937	310	455	354	246	452	318	336	489	370	428	741	492	573	467	667	790	432	388	504	482	148	247	216	265	678	891	758	589	316	411	391	326	230	181	363	192	414	465	352	311	226	206	248	228	236	370	281	257	337
sw00098	1790	2191	2368	1676	1958	2432	1790	2278	1902	2270	2901	2032	7850	11237	14102	8664	7685	6390	10071	12186	1152	1569	1547	1623	2408	2332	2242	1670	968	1132	1719	1381	2298	1667	3007	1945	2752	3923	2825	2123	1364	1819	2160	1160	1743	2078	1596	1982	1703
sw20450	468	546	575	392	613	425	790	998	551	1170	1393	711	283	34	94	329	173	27	88	257	135	253	292	243	22	120	315	60	43	96	163	114	149	47	244	111	269	226	192	156	201	275	249	227	355	244	325	290	250
sw00410	93	50	105	129	79	175	188	79	142	198	135	176	124	66	65	613	35	99	62	275	13	94	77	111	15	186	47	86	71	150	69	86	180	73	335	161	76	211	283	112	247	128	106	332	239	90	149	274	94
sw10495	1257	1914	1120	1201	2242	1242	924	1689	772	1245	2153	912	842	603	667	1123	471	733	876	611	657	674	382	628	1098	1203	1121	1230	1163	1026	1091	1343	804	561	851	638	1173	926	1020	707	908	467	858	1047	552	771	725	727	594
sw09205	131	212	168	77	227	150	35	147	133	69	205	129	408	366	437	357	179	105	158	188	81	134	108	97	63	146	203	69	268	303	211	203	96	116	246	19	148	177	188	112	87	17	13	72	58	75	71	24	117
sw12318	-80	14	20	-62	12	16	-122	-11	28	-225	88	8	2	15	-3	63	26	30	27	131	4	1	-5	-5	-24	65	-44	25	9	-41	-29	18	-21	38	120	-26	63	44	25	-13	8	-52	17	3	-22	-6	-13	-28	-9
sw12459	675	883	656	627	977	697	787	755	622	858	1026	770	608	192	266	831	372	336	416	494	207	226	158	247	385	584	487	358	802	999	992	983	357	120	376	142	439	510	491	282	125	125	268	292	131	265	177	217	325
sw01689	-3	5	23	-1	17	118	-13	37	94	57	92	108	35	27	0	137	4	19	17	98	1	77	5	129	15	68	-23	81	18	71	11	33	1	21	103	34	35	25	59	32	5	11	-11	29	45	58	12	-3	151
sw13109	146	276	210	110	213	189	51	241	206	112	373	227	79	40	36	139	208	125	225	375	116	173	126	147	-22	-40	-108	12	9	-24	-20	10	34	25	203	-46	90	141	70	-9	48	8	128	94	40	113	16	63	53
sw08248	47	118	147	103	142	200	1277	1013	1342	1573	1289	1482	125	0	-7	153	37	9	34	92	18	30	19	39	28	103	23	27	15	29	46	27	7	21	36	11	43	29	44	0	4	0	73	10	47	55	47	18	27
sw03550	414	1017	443	342	947	458	-47	89	20	43	99	23	125	119	138	151	52	43	45	150	25	49	27	42	32	138	13	50	7	203	70	32	21	30	88	-3	21	29	47	17	19	24	27	39	114	48	57	0	30
sw05259	28	48	51	22	55	65	497	327	506	667	432	556	26	-3	0	68	20	25	8	48	4	18	0	45	47	130	57	73	15	36	5	30	79	17	95	19	46	14	88	-20	71	16	34	28	44	48	23	32	56
sw19063	19	164	218	0	176	196	-41	179	110	9	262	176	28	23	25	163	115	103	801	929	203	302	326	616	38	45	10	33	-3	-13	19	9	90	108	269	57	57	78	82	57	0	-4	30	52	-1	-19	0	26	10
sw05171	26	4	18	15	14	21	-7	15	-6	54	23	52	24	34	102	67	25	18	40	70	19	6	-3	73	1	50	16	65	23	46	17	18	77	12	225	-7	30	169	82	-3	83	90	44	153	135	31	88	165	21
sw06337	286	621	614	398	617	706	561	666	694	543	802	612	197	247	266	268	139	27	79	256	7	109	108	-15	116	204	372	230	141	119	185	229	98	151	223	119	307	321	259	219	166	44	174	251	87	120	288	283	94
sw04386	21	15	36	-17	29	43	71	177	218	281	371	194	25	18	116	34	14	-34	2	86	0	22	4	35	-28	35	33	37	3	1	-11	9	-6	12	82	-38	32	40	68	26	8	28	52	34	32	70	27	10	59
sw01764	183	194	214	218	214	281	294	320	339	403	356	361	202	281	310	273	148	87	184	239	89	118	91	173	171	355	355	293	45	227	147	68	141	116	210	1280	200	201	228	110	198	105	168	320	161	226	169	227	121
sw12303	1309	3851	3117	1873	3947	3161	5091	7766	7141	3467	9097	6774	1656	2146	2994	2297	875	884	1076	1164	549	671	632	745	634	574	535	705	934	913	1327	1439	491	423	695	580	961	723	761	557	1109	931	1397	1356	1162	772	1548	1384	799
sw02077	-23	-12	-11	5	2	22	-4	17	5	37	28	45	15	20	3	70	4	12	2	95	-3	20	0	26	582	95	27	4918	16	69	-3	21	32	8	106	-34	8	19	63	-5	24	17	26	38	104	6	23	29	24
sw05042	1564	2049	1345	1430	2071	1084	762	1087	536	854	1638	641	467	520	652	654	392	272	333	555	164	223	197	220	215	264	287	300	317	306	512	611	245	181	401	207	390	391	467	186	316	861	823	460	812	533	687	666	352
sw10835	552	1015	816	713	979	882	1459	1342	1488	1498	2001	1583	2724	2536	3447	2409	1538	1082	1231	1625	479	574	496	609	871	1417	1450	608	798	880	967	790	818	470	882	941	1101	1282	1178	671	616	279	711	491	358	616	457	486	650
sw00983	66	30	57	89	46	60	98	61	112	235	78	143	120	185	149	222	127	132	176	247	31	59	34	111	53	193	108	132	45	114	29	49	200	30	241	134	65	148	225	62	199	83	181	219	230	102	136	263	80
sw05323	375	966	434	492	1009	547	385	700	388	385	1035	381	134	184	226	190	106	5	62	195	48	75	57	67	265	201	125	325	139	149	150	208	169	51	215	123	129	175	293	38	295	180	242	216	216	190	185	195	241
sw10055	694	663	1155	665	829	1239	403	347	537	415	473	599	624	842	952	793	383	385	498	462	227	294	247	326	404	329	430	531	358	306	409	501	276	224	407	176	304	338	530	339	329	194	488	467	258	318	517	463	253
sw07043	44	75	55	18	101	113	-10	90	84	70	138	71	38	97	58	89	46	0	12	83	25	26	30	81	-3	62	50	67	28	39	15	41	65	17	151	119	112	99	170	45	31	110	134	26	106	87	111	76	109
sw10764	7	48	51	13	46	54	-55	36	22	-53	61	28	66	8	21	94	35	7	30	133	29	21	11	247	22	78	54	41	-6	14	25	24	38	56	129	19	71	84	166	66	17	-1	16	11	71	59	27	22	48
sw12246	410	739	642	404	717	563	1025	1052	1265	1210	1537	1461	92	69	105	135	71	18	49	359	35	80	45	54	40	-15	3	62	91	13	34	96	31	17	143	38	57	67	68	20	40	-57	17	73	-28	-26	13	21	4
sw20138	-34	46	85	-39	50	43	-125	5	41	-135	70	114	-8	30	-10	106	2	-7	19	138	24	20	-13	71	3	42	-54	33	2	-18	-14	14	-3	17	82	-3	27	42	28	24	19	-36	0	47	7	69	-16	-6	-18
sw03026	133	209	157	89	216	187	76	246	197	155	247	192	141	117	113	203	58	38	73	136	62	75	75	149	47	95	20	50	71	104	53	112	48	56	172	99	115	209	106	83	72	24	137	37	91	109	45	47	66
sw12833	1552	1109	892	1099	968	722	190	384	272	228	440	293	581	494	784	856	351	263	530	544	49	62	30	54	361	533	301	212	91	149	149	133	382	185	397	76	373	579	583	278	24	4	48	53	15	47	30	29	39
sw10711	5	92	250	32	113	178	-41	63	103	-165	61	124	-13	-5	54	0	4	-12	8	25	7	-4	15	56	9	-5	-27	-4	29	-3	52	43	1	21	72	-19	98	29	71	62	47	-31	60	56	-12	8	61	50	36
sw14225	74	68	100	65	64	105	103	140	172	139	308	229	65	92	87	141	41	25	34	85	8	24	28	16	32	37	20	54	42	29	55	47	38	12	136	-38	76	69	41	7	18	21	10	15	49	73	16	57	42
sw03661	111	34	72	129	68	155	335	162	211	436	248	182	33	20	21	222	50	-23	6	108	-2	31	5	91	26	125	23	92	17	142	30	62	57	12	100	-19	19	29	53	32	115	69	40	64	147	30	77	36	15
sw00911	89	77	97	160	95	113	261	244	296	428	302	293	184	170	240	249	94	127	128	251	54	86	77	136	171	284	294	249	97	112	52	104	219	56	149	123	104	80	262	41	325	98	99	66	118	98	112	71	162
sw06641	-6	50	71	39	75	123	103	186	227	98	305	259	222	189	233	221	55	23	40	86	16	10	24	35	7	90	98	44	14	28	38	39	14	30	115	-30	43	46	44	11	20	-9	14	24	28	34	11	15	21
sw13190	472	623	561	470	629	611	1470	1387	1630	1478	1877	1808	229	214	426	309	164	76	195	166	154	141	147	161	152	138	88	132	247	217	221	248	105	47	198	-19	189	184	222	99	217	100	216	231	117	36	115	187	97
sw04418	61	34	111	22	50	140	-30	34	121	39	62	70	27	163	222	72	25	-1	10	35	4	-48	-5	50	17	85	37	27	59	18	14	67	76	12	93	0	71	27	69	20	50	49	51	52	96	41	69	83	37
sw06373	-2	36	40	15	23	434	149	137	252	195	246	195	28	61	62	55	17	14	10	51	22	80	25	132	11	45	3	62	-2	31	30	13	964	30	100	19	32	131	78	51	4	36	48	34	96	50	48	38	56
sw18761	1868	1696	1263	1907	1554	1030	2661	1654	1192	2633	2441	1413	866	667	714	1107	794	405	526	809	192	394	326	344	265	415	460	474	458	325	455	660	661	354	718	238	442	753	785	408	588	753	912	624	837	775	952	935	718
sw07932	205	557	349	227	506	324	905	1480	792	706	1732	769	657	243	631	766	383	448	541	441	203	199	174	234	112	617	542	86	455	323	408	497	371	211	580	65	390	833	501	225	235	92	297	212	105	280	121	177	343
sw02164	16	24	36	62	30	39	79	29	44	37	94	63	69	90	149	152	31	54	51	103	19	54	42	77	122	123	74	232	23	53	34	25	96	34	212	30	21	103	173	38	177	48	44	128	177	73	94	169	151
sw18345	564	613	575	491	636	464	1198	1242	792	1253	1389	1096	302	250	321	334	276	216	214	319	130	192	206	178	122	183	105	111	185	164	168	316	130	164	169	69	195	179	144	72	257	198	190	268	245	252	226	219	205
sw01122	8	21	33	8	42	23	-59	26	23	16	30	45	29	52	0	29	53	54	25	72	25	15	27	30	7	47	16	54	34	81	40	46	84	30	87	61	24	44	170	30	20	83	34	112	112	84	58	76	171
sw01744	148	244	224	227	296	318	202	168	222	265	277	280	96	143	164	241	61	147	100	166	66	77	62	189	200	105	101	308	196	243	80	223	152	116	146	222	206	120	194	169	179	60	115	204	117	166	154	99	63
sw18021	696	765	936	678	922	786	644	914	766	812	1304	880	393	458	430	484	431	214	197	580	247	367	316	305	319	438	348	478	147	135	126	215	185	190	353	169	184	306	236	194	102	61	108	175	118	115	118	205	95
sw11145	187	276	217	153	264	171	87	176	226	169	237	160	56	114	116	67	91	72	55	86	51	54	46	63	59	161	128	62	96	107	135	106	130	112	111	-7	131	122	145	95	225	111	121	111	158	127	159	118	79
sw06469	4	30	52	32	26	40	70	46	74	43	126	102	105	46	51	156	59	52	73	95	19	-12	29	36	36	83	101	65	29	72	24	29	161	12	75	-42	74	103	239	40	74	131	35	60	133	48	77	75	31
sw11246	43	126	140	34	111	275	98	253	319	83	331	261	154	90	171	173	68	50	109	117	68	83	69	154	110	183	152	153	84	26	95	83	631	345	881	392	967	1053	984	557	91	0	43	59	66	227	56	11	65
sw05436	38	88	72	25	138	84	1	20	28	11	26	32	43	64	40	92	20	34	27	66	8	-1	0	64	-19	57	16	33	9	28	-2	20	12	-8	85	73	-2	29	48	17	36	20	28	38	30	108	18	68	21
sw09289	54	122	78	68	94	182	19	147	142	10	229	60	158	163	211	282	155	959	333	353	13	32	37	399	374	760	372	411	139	87	69	104	158	69	340	53	178	203	172	57	330	101	149	264	159	145	82	261	241
sw15634	38	77	144	51	105	165	102	144	257	114	205	246	130	180	215	174	106	212	184	136	86	60	57	90	126	128	115	167	73	121	110	113	127	64	143	49	85	103	118	87	111	124	144	53	161	37	97	68	27
sw20357	-22	73	61	24	96	80	199	180	146	114	338	186	45	-30	-7	68	28	41	21	98	3	28	17	1	-34	60	-13	-12	1	79	17	8	-6	-12	105	-19	38	59	39	32	27	-24	5	36	17	56	20	14	33
sw02909	49	61	92	53	72	78	23	102	127	218	232	238	126	76	91	232	79	170	66	272	40	84	68	-28	40	178	77	98	33	184	56	46	94	56	225	34	38	122	155	41	91	84	158	152	149	59	108	107	19
sw08421	65	27	86	53	45	259	-81	-26	117	-75	30	35	294	383	470	576	118	141	180	232	24	49	32	19	21	78	0	58	454	553	487	499	52	56	83	-19	93	71	78	-11	62	19	37	100	64	22	50	95	47
sw18896	3235	3767	3552	3272	3979	3577	9953	6262	8598	11419	9098	9392	2008	1970	2484	2380	1740	1763	2114	2180	1710	1857	1464	2228	9092	7220	10532	11729	1188	842	1280	1814	2553	2177	3934	1864	2508	3987	2948	2579	3991	4129	4503	3972	4384	3045	4358	4371	2787
sw09051	143	126	128	158	202	157	371	524	324	424	546	342	201	290	430	241	152	61	163	210	12	9	10	39	61	93	40	56	-2	-8	10	31	46	-4	80	-7	27	55	95	24	37	95	84	69	234	-16	143	75	101
sw11412	47	133	86	18	123	118	88	217	247	86	269	269	16	18	7	83	79	-30	38	181	77	93	84	181	64	22	10	94	-2	-3	-26	3	-37	8	70	-42	-2	38	15	-28	-10	-13	0	13	12	-12	0	-7	-33
sw14031	102	164	232	122	215	272	21	167	205	25	228	191	77	141	120	122	25	30	27	73	11	0	-4	97	21	17	16	44	32	31	7	53	15	30	143	30	52	29	80	11	67	-20	39	38	43	-2	25	21	-3
sw20611	-28	20	18	-12	17	30	64	171	80	14	291	134	5	-17	10	12	43	43	21	73	59	42	23	142	-3	-27	-50	-6	-25	-36	-24	-12	3	0	98	88	60	57	14	-11	-19	-30	-1	18	-2	23	-4	-14	-3
sw12894	341	552	390	355	439	390	579	728	580	596	1038	562	490	448	590	592	422	301	547	499	176	189	213	187	301	674	714	258	286	205	266	242	406	241	501	276	519	541	429	215	379	108	245	177	153	270	159	182	272
sw04173	44	189	93	41	223	253	-8	207	184	53	271	120	134	131	226	326	139	69	55	384	19	42	43	177	59	103	23	123	45	26	8	27	-12	25	110	30	65	55	23	36	87	0	36	54	32	56	34	20	42
sw18725	-80	15	11	-55	14	23	-66	29	40	-136	72	78	-10	-1	-47	83	13	-30	-15	188	7	17	6	43	-19	5	-64	25	-6	-14	-26	14	7	17	172	69	57	118	46	36	-9	-16	-26	31	28	37	-1	15	-22
sw05352	6	58	50	31	83	76	25	134	139	53	171	52	115	133	218	187	94	98	107	203	35	39	14	52	24	130	57	67	28	92	37	49	34	34	190	38	63	46	35	34	44	71	6	54	102	50	55	44	75
sw06220	5	135	92	8	147	150	79	286	300	64	500	229	30	22	149	96	11	0	40	151	12	19	13	94	-21	40	40	-16	33	96	21	44	15	38	113	-26	68	57	64	20	43	26	77	107	101	48	80	96	60
sw09560	-13	5	8	8	12	14	-3	19	14	27	27	14	21	32	32	59	16	-3	19	73	20	21	5	94	38	138	40	77	17	29	10	25	23	25	90	-57	13	12	56	9	20	26	24	38	54	5	18	14	39
sw21054	779	687	1169	994	819	1219	1281	1445	1377	1485	1765	1978	407	366	368	447	257	196	305	394	153	191	135	225	213	292	379	186	170	124	148	285	129	108	100	188	274	65	155	91	224	313	286	402	387	247	376	486	247
sw20963	-10	115	82	10	135	99	127	222	238	178	352	391	60	34	36	153	70	52	34	179	8	22	0	57	1	428	172	29	22	19	-1	44	26	12	169	34	60	52	59	19	24	2	100	65	55	236	-1	36	130
sw13003	335	331	368	242	343	328	690	1811	731	854	2241	863	259	262	299	276	225	152	124	253	217	229	156	223	91	196	210	174	165	159	205	181	101	43	174	30	71	126	157	40	379	206	417	423	265	498	293	284	428
sw02081	116	77	129	105	102	2	122	141	75	244	233	253	219	245	295	286	143	236	266	298	111	111	114	215	78	380	115	165	97	101	61	87	110	60	287	84	74	160	151	66	83	149	165	148	244	252	132	218	62
sw22519	103	186	171	48	236	150	-12	255	151	84	398	219	148	90	153	284	178	136	158	259	66	63	24	163	49	100	88	75	87	14	20	107	112	38	189	134	153	184	154	43	193	175	318	266	219	241	158	305	238
sw20989	478	984	1189	503	1387	908	1324	2157	1757	1132	2116	1821	553	482	758	650	544	210	247	848	299	444	487	488	282	256	220	361	280	61	126	352	135	95	241	126	351	205	256	139	558	77	442	791	150	359	456	825	360
sw19759	38	123	103	-24	116	124	132	278	334	201	412	455	60	22	83	114	46	69	49	116	19	25	18	57	47	60	88	92	28	14	5	39	31	25	70	69	30	50	50	83	42	13	49	34	88	37	49	42	25
sw11608	73	123	142	70	128	134	4	121	133	74	177	152	294	1	32	298	146	165	204	257	110	154	77	240	143	287	149	167	200	263	266	213	20	38	88	34	65	48	58	30	10	55	102	81	89	186	67	41	176
sw02137	28	3	34	65	29	68	59	41	55	77	41	53	140	64	29	246	47	61	55	262	21	86	46	0	57	141	3	37	26	97	39	41	129	25	129	76	13	82	161	49	134	85	65	202	178	47	123	156	-3
sw13533	210	368	206	224	269	200	154	198	165	283	326	230	174	240	299	247	146	134	326	203	68	118	112	111	227	178	138	188	236	255	217	208	194	125	228	107	274	243	240	95	251	174	201	268	165	215	205	322	275
sw11425	428	795	372	280	819	364	-47	313	89	62	536	98	675	859	1083	1090	648	617	816	1260	38	124	114	126	131	103	27	329	-23	-21	-26	-6	124	51	226	88	98	247	278	80	251	9	105	270	98	293	139	270	180
sw00205	525	475	338	339	567	375	307	418	269	482	367	282	236	52	134	418	202	81	94	432	43	126	108	73	191	677	274	323	187	364	262	312	362	43	376	96	93	256	389	64	384	429	356	392	487	137	334	310	129
sw14053	455	458	358	508	474	294	314	373	258	515	500	334	238	298	288	322	136	419	143	278	104	112	65	160	131	133	138	182	185	169	127	177	171	43	243	103	186	260	320	26	274	68	143	266	128	198	195	280	171
sw04146	-49	15	20	5	12	9	-19	30	66	-58	57	61	40	47	29	46	43	-1	49	148	36	21	16	195	5	50	-13	0	3	36	14	21	-6	-4	83	2364	27	38	28	30	-15	-10	25	17	14	9	-6	-13	-31
sw12807	429	890	540	554	1113	620	1245	1506	1670	1266	1872	1446	186	233	317	225	127	87	105	181	57	70	58	88	194	151	44	216	18	-6	11	39	133	86	264	26	112	110	120	49	35	355	236	121	424	106	215	238	107
sw04676	17	-3	27	-20	21	22	-53	4	32	-1	48	44	4	10	43	69	14	12	19	82	9	10	5	4	55	158	71	90	29	232	39	77	48	17	77	53	57	48	126	24	30	5	53	40	37	73	26	23	24
sw19904	78	112	316	93	178	277	55	188	188	54	242	394	47	68	76	107	38	59	27	100	27	74	36	106	22	5	3	8	-6	36	-8	24	1	12	126	26	35	35	56	30	39	37	21	52	71	62	71	66	-4
sw09819	92	302	264	143	334	390	193	572	516	109	637	366	259	278	437	317	227	85	171	225	118	209	124	149	99	319	342	125	230	275	285	226	141	95	328	23	192	338	223	89	64	33	127	83	114	201	97	134	148
sw05457	121	461	190	205	490	193	-27	63	71	-7	187	189	595	708	740	656	184	147	139	270	33	160	113	156	187	277	315	230	42	59	67	38	51	34	190	0	145	158	115	49	35	3	67	38	44	72	21	13	25
sw06549	-36	26	51	-6	39	119	127	187	224	201	336	234	12	32	51	61	8	-14	-10	47	7	45	32	144	9	52	10	56	17	54	-5	16	-17	-12	92	-42	41	23	31	-9	19	-29	47	53	12	-12	-4	1	-24
sw11550	-121	-7	-11	-98	-6	-15	-160	-41	-4	-274	-13	-42	-39	-35	-54	-18	-7	0	-49	13	-9	-8	-24	1	-91	-68	-91	-86	-23	-48	-35	0	-43	-21	110	-53	38	16	-5	-26	-38	-66	-55	-35	-28	2	-28	-51	-34
sw06245	-27	22	23	-25	4	91	17	43	121	-31	71	74	30	56	36	77	748	-21	27	-7	1	37	11	129	2305	98	64	71	50	36	931	19	-12	8	121	-26	41	27	39	24	23	5	6	7	30	44	4	-2	19
sw01969	605	502	503	418	495	553	303	216	258	446	384	312	326	566	528	482	327	297	283	428	193	268	195	320	420	491	359	457	355	441	373	470	185	90	363	226	186	245	291	225	353	303	370	254	313	241	329	380	313
sw20950	-105	3	15	-53	-8	10	-120	-7	18	-180	16	-2	-28	29	18	39	-16	-36	-6	54	-11	34	-11	-19	-22	-22	-74	-14	24	-23	-35	14	-10	-8	52	-23	-16	23	25	0	11	-51	-14	30	-16	26	-18	19	-54
sw02299	79	42	87	39	63	108	74	34	105	92	69	145	39	95	94	76	28	25	45	88	28	38	25	92	28	128	57	79	50	81	28	62	101	30	116	23	43	57	203	57	92	81	34	189	128	27	80	172	37
sw15637	2	147	139	-31	188	194	46	180	336	53	655	276	165	192	302	226	184	870	180	412	14	31	20	130	1302	1289	1433	1553	40	106	48	47	208	90	322	80	167	190	259	49	70	-38	37	107	19	155	39	28	47
sw14107	1566	3106	2420	2362	3232	2150	713	1164	591	414	1473	596	3679	4302	5876	4671	953	699	1256	1582	198	266	206	251	4288	3921	2652	3284	45	94	97	58	6161	3716	4510	4904	6118	4736	6704	3856	156	67	266	184	134	198	237	228	208
sw15333	76	191	75	74	184	68	226	507	158	380	780	122	48	39	80	69	55	23	21	89	14	13	23	81	722	674	457	573	32	-19	21	16	126	17	180	-3	164	258	309	82	152	33	125	241	63	165	113	216	132
sw07931	748	209	546	463	231	547	142	49	140	230	96	178	41	68	54	81	32	89	85	57	13	40	31	73	26	188	132	111	22	76	60	37	57	64	192	92	123	158	111	103	159	160	64	913	259	1313	150	29	75
sw08379	-11	14	46	-22	8	39	-25	41	20	-45	58	55	137	1	-3	228	121	59	124	219	19	15	11	57	24	45	27	6	20	8	3	9	-3	8	57	23	43	31	21	28	39	-7	-14	22	33	-13	5	-12	30
sw01846	318	158	334	225	196	259	3352	1992	2640	5306	2659	3694	318	416	375	511	176	170	167	315	28	133	84	144	166	231	155	241	165	242	195	201	174	47	337	196	156	201	217	80	196	148	163	368	222	216	210	331	217
sw16323	430	733	722	525	768	918	367	533	532	480	816	583	511	455	853	1151	257	392	597	577	398	433	327	627	985	878	650	1034	650	446	291	484	199	5141	427	246	392	410	317	5457	645	19	404	760	81	340	288	673	344
sw06106	116	70	72	43	93	116	170	159	241	393	318	223	196	337	474	265	85	132	90	267	36	12	68	7	76	241	152	140	69	127	58	91	52	60	233	76	79	103	136	93	122	141	-20	249	195	216	99	113	158
sw13354	-37	-14	15	-84	8	-2	-125	-4	21	-87	-19	57	23	5	21	11	-2	-23	-25	53	5	-5	0	14	-47	-17	-57	-6	-8	-69	-21	1	-23	21	85	-19	16	29	0	9	-19	-14	13	-13	-4	-11	-3	-9	-1
[truncated: 11 more columns]

## Sheet: ClusterA-G
Cluster A	sw22304	sw06373	sw06268	sw14178	sw05259	sw17253	sw13066	sw13087	sw01846	sw13239	sw06411	sw14296	sw13190	sw06024	sw08248	sw09878	sw21132	sw03661	sw01634	sw14630	sw14412	sw01586	sw07023	sw19525	sw05306	sw09559	sw06441	sw20963
Cluster B	sw12313	sw14053	sw03497	sw05609	sw14441	sw10738	sw06538	sw05042	sw09990	sw05323	sw15735	sw10495	sw06571	sw02196	sw07669	sw14931	sw20191	sw12886	sw09854	sw14268	sw18761	sw09847	sw06077	sw18021	sw05335	sw15370	sw15283	sw13850	sw21054	sw19719	sw06109	sw18345	sw12246	sw12807	sw10367	sw13930	sw20816	sw11783	sw06337	sw20450	sw08630	sw22610	sw12459	sw09819	sw07932	sw12894	sw22005	sw11736	sw09507
Cluster C	sw06245	sw02077	sw04651	sw18896	sw15333	sw03680	sw08208	sw19768	sw15637	sw08858	sw13937	sw11439	sw11608	sw12336	sw21173	sw12607	sw12060	sw10956	sw09289	sw04676	sw01974	sw00398	sw09560	sw11797
Cluster D	sw06469	sw05870	sw02100	sw02010	sw01724	sw03842	sw01287	sw03845	sw04508	sw00410	sw02137	sw02275	sw05171	sw04431	sw05598	sw02164	sw07820	sw01122	sw02351	sw00362	sw00983	sw03350	sw02299	sw14475	sw21981	sw15107	sw14700	sw17775	sw20950	sw12318	sw11550	sw13354	sw20138	sw18725	sw01689	sw00108	sw00101	sw05685	sw12128	sw08644	sw09849	sw18667	sw22428	sw05886	sw07043	sw22519	sw18675	sw07599
Cluster E	sw11409	sw01764	sw04146	sw16323	sw05990	sw03756	sw10764	sw12065	sw18384	sw11246	sw05801
Cluster F	sw05436	sw15859	sw15858	sw14031	sw19904	sw12341	sw10711	sw12833	sw03550	sw07658	sw00770	sw10055	sw01969	sw11145	sw00205	sw01744	sw13533	sw07931	sw04418	sw05331	sw01559	sw00778	sw07636	sw08421
Cluster G	sw04173	sw05352	sw00098	sw02620	sw11425	sw07972	sw07850	sw02064	sw19063	sw05430	sw16606	sw08379	sw15634	sw06106	sw03214	sw06641	sw04416	sw08394	sw09051	sw00777	sw00911	sw02909	sw02081	sw11206	sw12051	sw09205	sw05457	sw13510	sw02942	sw14970	sw09049	sw10835	sw03555	sw14107
[truncated: 31 more columns]

## Sheet: female
gene	5th4D	5th5D	5th6D	5th7D	W0	W12h	W24h	W36h	W48h	P0	P1	P2	P3	P4	P5	P6	P7	P8	Moth
sw14412	0	0	0	0	0	0	0	0	0	0	0	0	2.68477	3.92172	0	0	0	5.46172	5.76242
sw10367	0	0	0	0	0	0	0	0	0	0	0	0	0	3.31804	0	0	0	0	8.23049
sw15859	0	0	0	0	0	0	0	0	9.31125	13.5252	6.9531	8.19582	6.67796	10.0723	7.99212	8.28333	6.56751	0	29.1224
sw14630	0	0	0	0	0	0	0	0	0	3.0078	0	0	2.96035	7.21416	0	2.92494	0	4.2738	15.5271
sw14931	0.956299	0	0.270147	1.36653	0.645501	0.966029	1.17891	6.86226	0	1.5812	1.48926	0	1.07826	1.40949	0	1.44431	1.37478	1.92368	2.25275
sw14296	0	0	0	0	0	0	0	0	0	4.65097	0	0	6.87025	16.0445	9.39514	9.53148	10.8531	5.34602	50.882
sw19719	0.574115	0.4983	0	0.255175	0.827729	0.969968	1.55374	0	0	1.81222	9.22965	7.8147	5.10882	2.0118	6.15914	2.18341	0	2.37388	2.69758
sw05609	0	2.55563	0	0	0	0	0	0	0	0	0	0	0	0	0	0	0	3.89724	5.25026
sw15845	0	0	0	0	0	0	0	0	4.77732	0	0	0	0	0	0	0	0	0	0
sw17253	0.323708	0	0	0	0.295744	0.262723	0.734914	0	1.11717	0.924739	1.22822	0	1.49774	1.48646	7.60735	1.61393	2.3194	0	12.2429
sw12313	0	0	0	0	0	0	0	0	0	3.23424	0	0	2.52215	4.5049	0	0	5.0252	6.65382	8.7019
sw07023	0	0	5.81464	0	0	0	0	0	0	0	0	0	0	0	0	0	0	0	4.16485
sw20191	0	4.54411	0	0	2.98871	3.71354	5.72205	0	0	8.0282	6.22185	0	4.01701	7.16883	5.14988	5.83093	6.00746	7.15048	11.0855
sw06538	0.925223	0.26662	0.216747	0	3.7542	1.14849	0.259088	6.25228	0	1.64017	6.39363	8.89415	7.16757	1.55337	0	0	0	1.49015	1.60573
sw07636	0	0	0	0	0	0	0	0	0	0	0	0	0	0	0	0	0	7.11452	5.69914
sw06411	0	0	0	0	0	0	0	0	0	2.60966	0	0	2.1475	3.62408	0	0	0	0	6.27651
sw14441	0	0	0	0	0	0	5.29823	7.64187	7.8966	9.2136	6.79449	10.7147	8.59535	8.17595	7.0018	6.67143	0	6.49834	14.2809
sw05306	0.225997	1.03314	0.793554	0.195024	0.364365	0	0.190792	0	0	0.814344	0	0.18265	0.836417	1.08229	0	0	0	1.07364	1.33962
sw14970	0	0	0	0	0	0	0	0	0	2.45094	0	0	0	0	0	0	0	3.04366	0
sw09847	0	0	0	0	0	0	0	0	0	0	0	0	0	2.58302	0	0	0	0	4.5617
sw07820	0	0	0	0	0	0	0	0	0	0	0	0	0	0	0	0	0	3.0532	0
sw07658	0	0	0	0	0	0	0	0	0	0	0	0	0	2.45876	0	0	0	0	6.24964
sw02620	0	0	0	0	0	0	0	0	0	0	0	0	0	0	0	0	0	3.22893	0
sw07669	0	0	0	0	3.34402	0	3.75995	0	0	6.47159	0	0	4.64739	6.55	0	0	4.275	8.64148	14.065
sw08630	0	0	0	0	0	0	0	0	0	0	0	0	0	0	0	4.04492	3.41634	0	0
sw06571	3.21919	0	0	5.20603	4.09474	2.79222	5.9064	0	0	7.17379	4.99239	6.43511	7.24292	10.7345	6.02848	5.29249	6.72664	9.24495	18.0228
sw11409	0	0	0	0	0	0	0	0	0	0	0	0	2.525	2.77455	0	0	0	0	0
sw06234	0	0	0	0	0	0	0	0	0	0	0	0	0	3.64412	0	0	0	0	0
sw10738	0	3.03997	0	0	0	0	0	0	0	2.95661	0	0	0	3.75435	0	0	0	7.42986	10.3286
sw06109	0	0	0	0	0	0	0	0	0	6.55404	0	0	4.04185	5.58689	0	0	3.73253	5.10603	10.9832
sw08858	0	0	0	0	0	0	0	0	0	2.70977	0	0	0	0	0	0	0	0	0
sw22207	0	0	0	0	0	0	0	0	0	0	0	0	0	2.90644	0	0	0	0	0
sw05331	0	0	0	0	0	0	0	0	0	0	0	0	0	0	0	0	0	6.89589	5.63939
sw06024	0	0	0	0	0	0	0	0	0	0	0	0	0	2.56889	0	0	0	4.09299	7.4665
sw00770	0	0	0	0	0	0	0	0	0	0	0	0	0	0	0	0	0	3.7158	0
sw12336	0.446942	0.534217	0.091305	0.126519	0.540104	0.434289	0.175707	0	1.07297	1.36843	0.855973	0.18481	0.775644	1.06052	0.169735	1.19603	1.39389	0.85533	12.9321
sw00777	0	0	0	0	0	0	0	0	0	0	0	0	0	0	0	0	0	5.52944	0
sw13930	2.65552	0	0	0	0	0	0	0	0	4.55583	0	0	4.51467	11.7702	0	5.65774	6.93413	7.48729	26.7162
sw02196	0	0	0	0	0	0	0	0	0	0	0	0	0	0	0	0	0	5.12361	0
sw09990	0	0	0	0	0	0	0	0	0	0	0	0	2.59983	6.3015	0	0	0	0	10.9604
sw20816	0.955835	0.962083	0.214776	0.927113	0.856872	1.02589	1.46621	0	6.00487	5.86229	1.49579	0	4.40561	2.10968	0	2.35201	2.26386	2.19003	16.5854
sw08394	0	0	0	0	0	0	0	0	0	2.09588	0	0	0	0	0	0	0	0	0
sw18675	7.86534	3.26493	10.594	12.4976	2.59073	3.1801	2.81818	1.4915	0.33158	0.30054	0.0851385	0.048207	0.150651	0.426214	0.0478654	0.288689	0.554473	0.666884	1.18152
sw14268	0	0	0	0	0	0	2.7128	0	0	2.6875	0	0	0	3.69847	0	0	0	4.78759	0
sw03214	0	0	0	0	0	0	0	0	0	0	0	0	2.46074	0	0	7.96575	11.9668	7.51746	7.69178
sw19768	0	0	0	0	0	0	0	0	0	0	0	0	0	0	0	0	0	0	8.65124
sw09049	0.316925	0.262306	0	0	0.0472586	0.206835	0.0940833	0.0680334	0.0857869	0.572644	0.147028	0.072726	0.245846	0.577175	0.0844119	0.841089	0.192857	0.820427	1.11096
sw03497	0	0	0	0	0	0	0	0	0	0	0	0	0	0	0	0	0	4.22856	5.48334
sw19525	0	0	0	0	0	0	0	0	0	3.7816	0	0	0	3.34567	0	0	0	3.21134	7.96774
sw22610	0.95339	0.975887	0.155275	0.162599	0.702777	0.835016	1.27492	1.24757	1.66994	1.78396	1.75001	10.9237	1.73613	2.07016	8.09946	2.61431	0	2.50966	4.55409
sw15735	0.701059	0.0991492	0.870055	1.27299	6.76019	1.25151	1.90864	14.2192	0.167828	2.26658	3.45551	2.83522	2.24613	2.42949	2.55806	2.5911	2.87301	3.17893	3.70941
sw12886	0	0	0	0	0	0	0	0	0	4.60665	0	0	4.14078	9.33465	4.78618	0	0	4.89828	18.0697
sw12060	0.732699	0.830744	0.20176	1.02703	0.677851	0	0.251271	1.26876	6.63618	1.44497	5.09146	0	0	1.23365	0	2.6587	10.011	2.75693	2.50354
sw15370	0	2.86871	0	0	2.31258	0	0	0	43.454	13.1026	0	0	4.47895	6.27682	0	0	15.8911	8.31706	8.48246
sw11783	0	0	0	0	0	0	0	0	0	2.25539	0	0	2.55869	3.33373	0	0	0	0	7.84129
sw21173	0	0	0	0	0	0	0	0	0	0	0	0	0	0	0	0	0	3.45825	0
sw01559	0	0	0	0	0	0	0	0	0	0	0	0	0	0	0	0	0	4.48596	5.80817
sw00778	0	0	0	4.84893	0	3.58167	0	0	0	4.53602	0	0	2.14498	0	0	0	0	0	0
sw00362	0	0	0	0	0	0	0	0	0	0	0	0	0	0	0	0	0	3.57428	0
sw15283	0	0	0	0	0	0	0	0	0	0	0	0	2.89822	4.81737	0	4.08379	0	3.47365	12.2625
sw22428	0	0	0	0	0	0	0	0	0	0	0	0	0	0	0	0	0	2.42044	0
sw04416	0	0	0	0	0	0	0	0	0	0	0	0	0	0	0	0	0	5.36658	0
sw09854	0	0	0	0	0	0	0	0	0	2.49023	0	0	2.21419	0	0	0	0	3.17613	7.72541
sw12065	0.890977	1.0156	1.3266	1.63747	0.726235	3.07009	3.01152	1.60828	1.51214	2.24449	0.988003	0.108232	0.569466	0.331889	0.126791	0.136075	0.111693	0.0889202	0.572379
sw13066	0	0	0	0	0	0	0	0	0	0	0	0	0	2.32579	0	0	3.44122	3.52303	4.76739
sw07599	6.40101	3.17782	7.95439	0	4.6522	0	0	0	0	0	0	0	0	0	0	0	0	0	0
sw13850	0	0	0	0	0	0	0	0	0	0	0	0	0	0	0	0	0	2.61312	5.80813
sw12607	0.0438698	0.767187	0.875073	1.02645	0.552429	0.538669	0.784822	0.791709	1.11934	1.46072	1.07493	1.12729	0.916254	1.40935	0.869193	1.1295	1.44411	1.4708	3.0432
sw13937	0	0	0	0	0	0	0	0	0	0	0	0	0	0	0	0	0	0	4.33016
sw00098	1.24455	1.13325	1.78079	1.59798	1.16109	1.12997	1.19062	0.598894	1.40761	1.02295	1.67543	0.80034	0.698827	0.574658	0.757266	0.694004	0.668194	0.79203	0.546587
sw20450	2.57802	0	0	0	0	0	0	0	0	0	0	0	0	0	0	0	0	0	0
sw10495	0.880965	0.782555	0	0	0.669199	0.914662	1.05331	0	1.28118	1.20839	7.80523	1.53986	1.81197	2.17259	9.36377	8.81254	3.07131	4.36122	0
sw12459	0	0	0	0	0	0	0	0	0	0	0	0	0	0	0	0	0	6.06623	10.9843
sw19063	4.15761	4.45441	0	0	3.12576	0	0	0	0	0	0	0	0	0	0	0	0	0	0
sw06337	0	0	0	0	0	0	0	0	0	0	0	0	3.03862	3.76854	0	0	0	0	6.11764
sw12303	0.389882	0.945476	5.50741	0	1.30686	1.956	1.41074	0	10.5378	2.06162	2.38548	1.91301	2.12836	3.96005	12.7565	14.1991	11.3987	5.27371	6.70307
sw05042	3.27327	4.84633	0	0	0	0	3.56846	0	0	3.53195	0	0	4.73893	0	0	0	0	0	0
sw10835	0	0	0	0	2.65285	0	0	0	6.06295	5.02946	0	0	3.3314	3.38098	0	0	4.24434	3.73748	8.03713
sw05323	0	0	0	0	0	0	0	0	0	0	0	0	0	2.74738	0	0	0	2.73362	5.40208
sw10055	0	0	0	0	0	2.3361	4.33758	0	0	6.00581	5.89237	0	6.02721	6.32115	5.40372	4.74551	4.57833	3.8641	15.2849
sw03026	0	0	0	0	0	0	0	0	0	0	0	0	0	0	0	0	0	0	3.79999
sw12833	0	0	4.3875	0	0	0	3.03266	0	0	5.39801	0	0	2.40181	3.96907	0	0	0	0	0
sw13190	0	0	0	0	0	0	0	0	0	0	0	0	2.23719	0	0	0	0	0	6.40223
sw18761	0	0	0	0	0	0	5.63265	0	0	0	0	0	5.41468	6.9145	0	0	0	2.75236	9.3752
sw07932	0	0	0	0	0	0	0	0	0	0	0	0	0	0	0	0	0	0	9.10842
sw18345	3.08415	0	0	0	0	0	0	0	0	0	0	0	0	3.04707	0	0	0	4.43883	5.62
sw01744	0	0	0	0	0	0	0	0	0	0	0	0	0	0	0	0	0	3.79318	0
sw18021	0	0	0	0	0	0	0	0	0	0	0	0	0	3.13608	0	0	0	0	5.22184
sw18896	2.28466	2.41998	6.88494	1.09711	0.681518	1.02055	1.02751	11.3086	5.44871	2.35269	1.2445	0.984599	0.963187	1.33139	1.49836	2.39376	3.83026	1.5937	2.20037
sw12894	0	0	0	0	0	0	0	0	0	0	0	0	0	0	0	0	0	0	5.2314
sw05352	0	0	0	0	0	0	0	0	0	0	0	0	0	4.2505	0	0	0	0	0
sw06220	0	0	0	0	0	0	0	0	0	0	0	0	0	0	0	0	0	3.16905	4.70173
sw21054	0	0	0	0	0	0	0	0	0	3.13856	0	0	0	3.5428	0	0	0	0	5.26258
sw20989	0	0	0	0	0	0	3.7171	0	0	3.29977	0	0	3.4191	5.83318	0	4.20933	0	0	6.73686
sw13533	0	0	0	0	0	0	0	0	0	0	0	0	0	0	0	0	0	4.48742	0
sw11425	0	0	0	0	0	0	5.11847	0	6.901	8.28999	6.54692	0	4.26533	5.52721	0	0	4.56666	0	8.9119
sw14053	0	0	0	0	0	0	0	0	0	0	0	0	0	0	0	0	0	0	4.56663
sw12807	0	0	0	0	0	0	0	0	0	0	0	0	0	0	0	0	0	0	7.04396
sw05457	0	0	0	0	0	0	0	0	0	0	0	0	0	3.76034	0	0	0	0	0
sw01969	2.37433	0	0	0	0	0	0	0	0	3.17011	0	0	0	3.44653	0	0	0	9.00547	5.59828
sw15637	0	0	0	0	0	0	0	0	0	0	0	0	0	3.22301	0	0	0	0	8.28237
sw14107	0.399796	0.0815095	0.103126	0.131116	0.448883	0.691098	0.771696	0	0.893657	1.0545	0.9957	0.979396	0.71522	0.0724984	0.114736	0.538767	0.167679	0.262467	0.542151
sw07931	0	0	0	0	0	0	0	0	0	0	0	0	0	0	0	0	0	3.42044	0
sw01846	0	0	0	0	0	0	0	0	0	0	0	0	0	0	0	0	0	4.55249	0
sw16323	5.73263	10.4685	0	9.9333	0	0	0	0	0	2.5825	0	0	3.23924	5.65621	4.92525	4.16655	4.0584	0	12.9997

## Sheet: male
gene	5th4D	5th5D	5th6D	5th7D	W0	W12h	W24h	W36h	W48h	P0	P1	P2	P3	P4	P5	P6	P7	P8	Moth
sw14412	0	0	0	0	0	0	2.39448	0	2.83747	3.52952	0	4.16557	3.8885	6.17536	0	0	0	5.08715	0
sw15859	0	0	0	0	0	0	3.10733	0	6.94955	5.78327	0	4.68669	0	0	0	0	0	0	4.83582
sw14630	0	0	5.03622	0	0	0	2.3419	0	0	4.57845	0	3.64743	4.19869	6.30124	0	0	0	0	5.08741
sw14931	0.886447	0.757786	5.35926	0.967588	0.631646	0.995661	1.12595	1.37804	1.58851	1.71923	0	5.89498	1.33614	0.127803	0	0	0	0	2.46183
sw14296	0	0	0	0	0	2.24509	4.56316	3.3646	4.84603	6.78735	0	4.97414	4.39673	8.098	0	0	0	0	0
sw19719	0.297696	4.06894	0.215773	0.206329	0	3.13001	1.14872	5.52331	1.53501	1.72044	7.51957	6.70034	1.94156	6.23445	0	0	0	1.2165	0.329982
sw01586	0	0	0	0	3.17617	0	2.98737	4.0658	4.13244	5.07411	0	4.18573	0	4.88736	0	0	0	4.04128	4.32643
sw15845	0	0	0	0	0	0	0	0	3.02335	2.8023	0	0	0	0	0	0	0	0	0
sw17253	0	0	0	0	0	1.72214	2.02054	1.01577	2.1047	6.38513	8.46602	10.2086	2.45113	7.48436	0	6.52773	1.77986	1.01107	1.87804
sw12313	0	0	0	0	0	0	0	0	0	3.26501	0	0	2.7871	0	0	0	0	3.0429	0
sw07023	0	0	7.32336	0	0	0	0	0	0	0	0	0	0	0	0	0	0	0	0
sw20191	0	4.5704	5.15965	4.15808	0	3.07819	5.1792	5.9688	6.30936	6.73959	6.96246	4.98492	4.89663	7.05938	0	0	0	5.62562	5.73117
sw13510	0	0	0	0	0	0	0	0	0	0	0	0	0	2.99493	0	0	0	0	0
sw06538	1.04117	0	0.175804	0.276316	3.42065	2.81092	0.956993	1.47263	0.330709	1.31817	0	4.84825	5.45292	1.51912	0	0	0	1.21498	0.223116
sw13087	0	0	0	0	0	0	0	0	0	4.03492	0	0	0	3.70899	0	0	0	0	0
sw07636	0	0	0	0	0	0	0	0	0	0	0	0	0	0	0	0	0	6.16413	4.40527
sw06411	0	0	0	0	0	0	0	0	0	3.5281	0	0	2.84247	0	0	0	0	3.59541	7.24406
sw14441	0	0	0	0	0	2.66376	3.42388	7.03095	6.26113	0	0	10.0959	8.10167	11.6657	4.79375	11.5552	6.10595	4.99726	7.66943
sw05306	1.00655	0	0.15011	0.243219	0.769261	2.76754	3.41	1.26827	4.30324	2.51814	0	2.31473	2.76815	3.07452	0	2.88378	6.33624	1.47735	3.36557
sw14970	0	0	0	0	0	0	0	0	0	2.6239	0	0	0	4.73772	0	0	0	5.1424	0
sw16606	0	0	0	0	0	0	0	0	3.05446	0	0	0	0	3.39482	0	0	0	0	0
sw07669	0	0	0	0	3.28462	0	2.81125	3.21559	0	5.18158	0	3.799	3.32226	4.56881	0	0	0	2.6204	4.38631
sw14178	0	0	0	0	0	0	0	0	0	0	0	0	0	0	0	0	0	4.99612	6.75403
sw06571	3.80204	4.58758	5.67628	3.83623	3.84992	2.42751	3.92673	5.02724	0	5.0753	0	4.17463	5.01426	6.61587	0	0	0	0	0
sw11409	0	0	0	0	0	0	0	0	0	2.50031	0	0	2.94219	0	0	0	0	0	0
sw06234	0	0	0	0	0	0	0	0	0	2.45446	0	0	2.67685	0	0	0	0	0	0
sw10738	0	0	0	0	0	0	0	0	0	0	0	0	0	5.32797	0	0	0	3.71403	0
sw06109	0	0	0	0	0	0	3.09474	2.64446	2.60576	4.93177	0	3.68388	4.09866	4.91722	0	0	0	0	0
sw08858	0	0	0	0	0	0	0	0	0	3.86756	0	0	0	3.00576	0	0	0	2.93642	0
sw22207	0	0	0	0	0	0	0	0	0	3.11242	0	0	0	0	0	0	0	0	0
sw00770	0	0	0	0	0	0	0	0	0	0	0	0	0	0	0	0	0	3.3705	0
sw12336	0.728355	0	0.580746	0.659695	0.617891	0.411693	0.493392	0.563416	0.975028	1.45682	5.54795	0.897461	0.925954	1.02631	1.29088	1.71692	8.07491	1.03604	1.32184
sw13930	0	0	0	0	0	0	0	3.26946	0	0	0	2.88844	3.01184	0	0	0	0	0	0
sw02196	0	0	0	0	0	0	0	0	0	0	0	0	0	0	0	0	0	2.60034	0
sw20816	0.983226	1.05835	0.168687	0.904542	0	1.00211	1.13859	1.28546	1.62042	1.60656	6.35945	1.45357	1.45355	1.56338	1.66182	0	0	0.918784	1.16616
sw08394	0	0	0	0	0	0	0	0	0	3.07934	0	0	0	0	0	0	0	0	0
sw18675	4.34014	15.5523	14.5224	10.1308	2.50164	1.82997	2.1007	2.04307	0.399018	0.291014	0.041404	0.113891	0.155281	4.76857	0.107073	0.0478065	0.0774935	0.262312	0.47543
sw14268	0	0	0	0	0	0	0	0	0	5.40812	0	2.70656	0	0	0	0	0	4.25834	5.00365
sw03214	0	0	0	0	0	0	0	0	0	0	0	0	4.62493	10.093	0	15.6783	17.883	8.34564	14.0993
sw02942	0	0	0	0	0	0	0	0	3.36692	0	0	0	0	2.93606	0	0	0	0	0
sw19768	0	0	4.31459	0	0	0	0	0	0	0	0	0	0	0	0	0	0	0	0
sw09049	0.209544	0	0	0	0.0496695	0.140537	0.151267	0.225904	0.378163	0.391732	0.132018	0.269369	0.398492	0.665499	0.218886	0.9655	1.22325	1.3021	0.128719
sw03497	0	0	0	0	0	0	0	0	0	0	0	0	0	0	0	0	0	2.524	0
sw19525	0	0	0	0	0	0	0	4.41516	2.93998	4.16106	0	0	3.20945	7.10088	0	0	0	4.93165	5.76616
sw22610	1.0949	1.0214	1.10285	0.130336	0.734504	0.932752	1.21676	1.08355	1.76098	1.70679	6.40458	1.96473	1.9343	1.946	5.73041	1.95146	6.30702	1.06947	1.19161
sw15735	0.92988	0.808445	0.943124	0.991435	0.589058	0.991687	1.41093	1.82152	1.30917	1.311	11.8182	2.55144	2.662	1.86271	1.93083	1.94841	1.45243	1.23459	1.49647
sw12886	0	0	0	0	0	0	0	0	2.24889	3.28657	0	0	0	5.92225	0	0	0	0	8.56599
sw12060	1.08452	1.17812	0.17053	0.226308	0.615173	0	1.0101	0.956415	1.53254	1.65161	0	1.03669	1.37984	1.73146	0	0	6.15797	1.55285	1.87834
sw15370	0	0	4.37765	0	3.27469	0	3.2416	5.34625	43.4314	16.7822	7.13777	4.98943	5.45079	6.55264	0	0	17.7054	0	0
sw11783	0	0	0	0	0	0	0	0	0	0	0	0	2.51968	0	0	0	0	0	0
sw00778	0	0	0	0	0	0	2.60175	0	3.08369	3.30129	0	0	0	0	0	0	0	4.6691	0
sw15283	0	0	0	0	0	0	2.65401	0	0	2.59044	0	0	0	0	0	0	0	0	4.88957
sw04416	0	0	0	0	0	0	0	0	0	0	0	0	0	3.26953	0	0	0	9.96316	4.08495
sw09854	0	0	0	0	0	0	0	2.89377	3.41882	4.30913	0	0	0	2.96405	0	0	0	0	0
sw12065	0.967228	0.81835	0.774387	0.846817	1.10258	2.66472	1.95427	1.24765	0.904216	0.933237	0	0.649403	0.646458	0.597501	0.130529	0.120164	0.157767	0.365461	0.445757
sw07599	0	4.82932	15.5262	5.02856	3.47086	0	0	0	0	0	0	0	0	0	0	0	0	0	0
sw12607	1.01339	1.02297	0.916644	0.881439	0.578222	8.66663	0.689373	0.893805	1.07207	1.58515	1.1209	1.06674	1.23516	1.503	1.28088	1.54198	1.62852	1.10369	2.36492
sw13937	0	0	0	0	0	0	0	0	0	0	0	0	0	0	0	0	0	3.35752	0
sw00098	1.21645	1.67741	1.46652	1.8411	1.41061	1.08391	1.37354	0.683728	1.24722	0.937682	1.25056	1.11448	1.08062	0.964499	1.15935	1.14296	1.05506	1.16337	0.930788
sw20450	3.8535	4.15341	0	0	0	0	0	0	0	0	0	0	0	0	0	0	0	0	0
sw10495	1.25755	0.871312	0	0	0	0.964943	1.08564	5.11976	1.58036	1.37689	4.9347	6.39251	1.67427	1.9018	5.61382	0	0	0	1.06996
sw12459	0	0	0	0	0	0	0	0	0	2.29978	0	0	0	0	0	0	0	2.68624	0
sw08248	0	0	0	0	0	0	0	0	0	0	0	0	0	0	0	0	0	2.81221	0
sw19063	0	3.83451	5.04638	0	0	0	0	0	0	0	0	0	0	0	0	0	0	0	0
sw12303	3.61994	4.41964	6.02503	0	1.39763	0	1.64526	2.0265	2.64232	9.56251	7.27142	9.39545	2.37292	2.32071	2.92548	2.6251	2.236	0	3.30121
sw05042	3.79256	8.38789	5.50869	0	0	0	0	0	0	2.42438	0	3.28541	4.41762	4.48748	0	0	0	0	0
sw10835	0	0	0	0	0	0	0	4.1013	4.61306	5.52053	0	4.00031	3.02387	8.3442	0	9.83198	6.74599	5.14684	5.33807
sw10055	0	0	0	0	0	3.37612	3.90077	3.03203	4.02161	4.955	0	0	3.66	3.79928	0	0	0	0	4.80974
sw12833	0	0	0	0	0	0	2.63207	3.7922	0	0	0	3.5475	3.9344	0	0	0	0	0	0
sw13190	0	0	0	0	0	0	0	0	0	0	0	0	2.62736	0	0	0	0	0	0
sw18761	0	0	0	0	0	0	2.86673	5.4307	3.3865	3.69355	0	4.98749	4.60077	0	0	0	0	0	4.38253
sw07932	0	0	0	0	0	0	0	0	0	2.53173	0	0	0	6.281	0	0	0	0	0
sw18345	0	4.92909	5.16383	0	0	0	0	0	0	0	0	0	0	0	0	0	0	4.206	0
sw18021	0	0	0	0	0	0	0	0	2.38849	0	0	0	0	0	0	0	0	0	0
sw08421	0	0	0	0	0	0	0	0	0	3.32269	0	0	0	2.66134	0	0	0	0	0
sw18896	2.37736	1.55358	2.7892	2.00604	0.844329	1.58285	1.05601	1.34601	5.52004	1.82371	1.32903	1.01828	1.04066	1.22792	1.15721	2.49603	4.65558	1.30498	2.8769
sw12894	0	0	0	0	0	0	0	0	0	2.36487	0	0	0	5.01491	0	0	0	0	0
sw05352	0	0	0	0	0	0	0	0	2.80477	0	0	0	0	4.03314	0	0	0	0	0
sw21054	0	0	0	0	0	0	0	0	0	2.65968	0	3.11187	3.21078	0	0	0	0	0	0
sw20989	0	0	0	0	0	0	2.23716	0	0	0	0	2.92717	4.43689	0	0	0	0	0	0
sw11425	0	0	0	0	0	0	4.83152	4.28751	5.52213	6.90407	5.39185	5.4582	5.9335	6.38224	0	0	0	5.61464	8.42514
sw05457	0	0	0	0	0	0	0	0	0	0	0	0	0	0	0	0	4.71983	0	0
sw01969	0	0	0	0	0	0	0	0	3.36192	2.61582	0	0	0	0	0	0	0	7.29519	0
sw15637	0	0	0	0	0	0	0	0	0	0	0	0	3.26435	4.07303	0	0	0	0	0
sw14107	0.53495	0.372993	0.0974214	0.421219	0.344538	0.849757	0.652499	0.754702	1.04873	0.879456	0.89659	0.964269	0.90448	0.95817	0.159906	0.929461	0.876692	0	0.771073
sw01846	0	3.75486	6.44703	0	0	0	0	3.05221	3.17934	5.26275	5.42424	6.50021	7.25841	7.07797	0	0	0	6.83611	7.11196
sw16323	4.98108	0	8.72716	9.88866	0	3.33123	4.16989	0	2.33801	3.2569	0	0	3.11151	4.54247	0	0	0	0	0

## Sheet: Cluster Ⅰ-Ⅲ
cluster Ⅰ	sw12807	sw14053	sw12894	sw07932	sw03026	sw19768	sw13937	sw20816	sw09854	sw14441	sw14630	sw15283	sw14296	sw13930	sw12886	sw06411	sw11783	sw10367	sw07658	sw15637	sw09847	sw18021	sw09990	sw06337	sw18761	sw20989	sw16323
cluster Ⅱ	sw12313	sw13066	sw06571	sw07669	sw06109	sw09049	sw20191	sw10055	sw05306	sw05609	sw06220	sw03497	sw01559	sw13850	sw12459	sw01969	sw07636	sw05331	sw18345	sw14412	sw10738	sw06024	sw05323
cluster Ⅲ	sw14268	sw14970	sw01846	sw07931	sw13533	sw01744	sw04416	sw22428	sw00362	sw21173	sw02196	sw00777	sw00770	sw07820	sw02620

## Sheet: Overlap genes
	female	female	female	female	female	female	female	female	female	female	female	female	female	female	female	female	female	female	female	male	male	male	male	male	male	male	male	male	male	male	male	male	male	male	male	male	male	male
gene	5th4d	5th5d	5th6d	5th7d	w0h	w12h	w24h	w36h	w48h	P0	P1	P2	P3	P4	P5	P6	P7	P8	moth	5th4d	5th5d	5th6d	5th7d	w0h	w12h	w24h	w36h	w48h	P0	P1	P2	P3	P4	P5	P6	P7	P8	moth
sw14412	0	0	0	0	0	0	0	0	0	0	0	0	2.68477	3.92172	0	0	0	5.46172	5.76242	0	0	0	0	0	0	2.39448	0	2.83747	3.52952	0	4.16557	3.8885	6.17536	0	0	0	5.08715	0
sw15859	0	0	0	0	0	0	0	0	9.31125	13.5252	6.9531	8.19582	6.67796	10.0723	7.99212	8.28333	6.56751	0	29.1224	0	0	0	0	0	0	3.10733	0	6.94955	5.78327	0	4.68669	0	0	0	0	0	0	4.83582
sw14630	0	0	0	0	0	0	0	0	0	3.0078	0	0	2.96035	7.21416	0	2.92494	0	4.2738	15.5271	0	0	5.03622	0	0	0	2.3419	0	0	4.57845	0	3.64743	4.19869	6.30124	0	0	0	0	5.08741
sw14931	0.956299	0	0.270147	1.36653	0.645501	0.966029	1.17891	6.86226	0	1.5812	1.48926	0	1.07826	1.40949	0	1.44431	1.37478	1.92368	2.25275	0.886447	0.757786	5.35926	0.967588	0.631646	0.995661	1.12595	1.37804	1.58851	1.71923	0	5.89498	1.33614	0.127803	0	0	0	0	2.46183
sw14296	0	0	0	0	0	0	0	0	0	4.65097	0	0	6.87025	16.0445	9.39514	9.53148	10.8531	5.34602	50.882	0	0	0	0	0	2.24509	4.56316	3.3646	4.84603	6.78735	0	4.97414	4.39673	8.098	0	0	0	0	0
sw19719	0.574115	0.4983	0	0.255175	0.827729	0.969968	1.55374	0	0	1.81222	9.22965	7.8147	5.10882	2.0118	6.15914	2.18341	0	2.37388	2.69758	0.297696	4.06894	0.215773	0.206329	0	3.13001	1.14872	5.52331	1.53501	1.72044	7.51957	6.70034	1.94156	6.23445	0	0	0	1.2165	0.329982
sw15845	0	0	0	0	0	0	0	0	4.77732	0	0	0	0	0	0	0	0	0	0	0	0	0	0	0	0	0	0	3.02335	2.8023	0	0	0	0	0	0	0	0	0
sw17253	0.323708	0	0	0	0.295744	0.262723	0.734914	0	1.11717	0.924739	1.22822	0	1.49774	1.48646	7.60735	1.61393	2.3194	0	12.2429	0	0	0	0	0	1.72214	2.02054	1.01577	2.1047	6.38513	8.46602	10.2086	2.45113	7.48436	0	6.52773	1.77986	1.01107	1.87804
sw12313	0	0	0	0	0	0	0	0	0	3.23424	0	0	2.52215	4.5049	0	0	5.0252	6.65382	8.7019	0	0	0	0	0	0	0	0	0	3.26501	0	0	2.7871	0	0	0	0	3.0429	0
sw07023	0	0	5.81464	0	0	0	0	0	0	0	0	0	0	0	0	0	0	0	4.16485	0	0	7.32336	0	0	0	0	0	0	0	0	0	0	0	0	0	0	0	0
sw20191	0	4.54411	0	0	2.98871	3.71354	5.72205	0	0	8.0282	6.22185	0	4.01701	7.16883	5.14988	5.83093	6.00746	7.15048	11.0855	0	4.5704	5.15965	4.15808	0	3.07819	5.1792	5.9688	6.30936	6.73959	6.96246	4.98492	4.89663	7.05938	0	0	0	5.62562	5.73117
sw06538	0.925223	0.26662	0.216747	0	3.7542	1.14849	0.259088	6.25228	0	1.64017	6.39363	8.89415	7.16757	1.55337	0	0	0	1.49015	1.60573	1.04117	0	0.175804	0.276316	3.42065	2.81092	0.956993	1.47263	0.330709	1.31817	0	4.84825	5.45292	1.51912	0	0	0	1.21498	0.223116
sw07636	0	0	0	0	0	0	0	0	0	0	0	0	0	0	0	0	0	7.11452	5.69914	0	0	0	0	0	0	0	0	0	0	0	0	0	0	0	0	0	6.16413	4.40527
sw06411	0	0	0	0	0	0	0	0	0	2.60966	0	0	2.1475	3.62408	0	0	0	0	6.27651	0	0	0	0	0	0	0	0	0	3.5281	0	0	2.84247	0	0	0	0	3.59541	7.24406
sw14441	0	0	0	0	0	0	5.29823	7.64187	7.8966	9.2136	6.79449	10.7147	8.59535	8.17595	7.0018	6.67143	0	6.49834	14.2809	0	0	0	0	0	2.66376	3.42388	7.03095	6.26113	0	0	10.0959	8.10167	11.6657	4.79375	11.5552	6.10595	4.99726	7.66943
sw05306	0.225997	1.03314	0.793554	0.195024	0.364365	0	0.190792	0	0	0.814344	0	0.18265	0.836417	1.08229	0	0	0	1.07364	1.33962	1.00655	0	0.15011	0.243219	0.769261	2.76754	3.41	1.26827	4.30324	2.51814	0	2.31473	2.76815	3.07452	0	2.88378	6.33624	1.47735	3.36557
sw14970	0	0	0	0	0	0	0	0	0	2.45094	0	0	0	0	0	0	0	3.04366	0	0	0	0	0	0	0	0	0	0	2.6239	0	0	0	4.73772	0	0	0	5.1424	0
sw07669	0	0	0	0	3.34402	0	3.75995	0	0	6.47159	0	0	4.64739	6.55	0	0	4.275	8.64148	14.065	0	0	0	0	3.28462	0	2.81125	3.21559	0	5.18158	0	3.799	3.32226	4.56881	0	0	0	2.6204	4.38631
sw06571	3.21919	0	0	5.20603	4.09474	2.79222	5.9064	0	0	7.17379	4.99239	6.43511	7.24292	10.7345	6.02848	5.29249	6.72664	9.24495	18.0228	3.80204	4.58758	5.67628	3.83623	3.84992	2.42751	3.92673	5.02724	0	5.0753	0	4.17463	5.01426	6.61587	0	0	0	0	0
sw11409	0	0	0	0	0	0	0	0	0	0	0	0	2.525	2.77455	0	0	0	0	0	0	0	0	0	0	0	0	0	0	2.50031	0	0	2.94219	0	0	0	0	0	0
sw06234	0	0	0	0	0	0	0	0	0	0	0	0	0	3.64412	0	0	0	0	0	0	0	0	0	0	0	0	0	0	2.45446	0	0	2.67685	0	0	0	0	0	0
sw10738	0	3.03997	0	0	0	0	0	0	0	2.95661	0	0	0	3.75435	0	0	0	7.42986	10.3286	0	0	0	0	0	0	0	0	0	0	0	0	0	5.32797	0	0	0	3.71403	0
sw06109	0	0	0	0	0	0	0	0	0	6.55404	0	0	4.04185	5.58689	0	0	3.73253	5.10603	10.9832	0	0	0	0	0	0	3.09474	2.64446	2.60576	4.93177	0	3.68388	4.09866	4.91722	0	0	0	0	0
sw08858	0	0	0	0	0	0	0	0	0	2.70977	0	0	0	0	0	0	0	0	0	0	0	0	0	0	0	0	0	0	3.86756	0	0	0	3.00576	0	0	0	2.93642	0
sw22207	0	0	0	0	0	0	0	0	0	0	0	0	0	2.90644	0	0	0	0	0	0	0	0	0	0	0	0	0	0	3.11242	0	0	0	0	0	0	0	0	0
sw00770	0	0	0	0	0	0	0	0	0	0	0	0	0	0	0	0	0	3.7158	0	0	0	0	0	0	0	0	0	0	0	0	0	0	0	0	0	0	3.3705	0
sw12336	0.446942	0.534217	0.091305	0.126519	0.540104	0.434289	0.175707	0	1.07297	1.36843	0.855973	0.18481	0.775644	1.06052	0.169735	1.19603	1.39389	0.85533	12.9321	0.728355	0	0.580746	0.659695	0.617891	0.411693	0.493392	0.563416	0.975028	1.45682	5.54795	0.897461	0.925954	1.02631	1.29088	1.71692	8.07491	1.03604	1.32184
sw13930	2.65552	0	0	0	0	0	0	0	0	4.55583	0	0	4.51467	11.7702	0	5.65774	6.93413	7.48729	26.7162	0	0	0	0	0	0	0	3.26946	0	0	0	2.88844	3.01184	0	0	0	0	0	0
sw02196	0	0	0	0	0	0	0	0	0	0	0	0	0	0	0	0	0	5.12361	0	0	0	0	0	0	0	0	0	0	0	0	0	0	0	0	0	0	2.60034	0
sw20816	0.955835	0.962083	0.214776	0.927113	0.856872	1.02589	1.46621	0	6.00487	5.86229	1.49579	0	4.40561	2.10968	0	2.35201	2.26386	2.19003	16.5854	0.983226	1.05835	0.168687	0.904542	0	1.00211	1.13859	1.28546	1.62042	1.60656	6.35945	1.45357	1.45355	1.56338	1.66182	0	0	0.918784	1.16616
sw08394	0	0	0	0	0	0	0	0	0	2.09588	0	0	0	0	0	0	0	0	0	0	0	0	0	0	0	0	0	0	3.07934	0	0	0	0	0	0	0	0	0
sw18675	7.86534	3.26493	10.594	12.4976	2.59073	3.1801	2.81818	1.4915	0.33158	0.30054	0.0851385	0.048207	0.150651	0.426214	0.0478654	0.288689	0.554473	0.666884	1.18152	4.34014	15.5523	14.5224	10.1308	2.50164	1.82997	2.1007	2.04307	0.399018	0.291014	0.041404	0.113891	0.155281	4.76857	0.107073	0.0478065	0.0774935	0.262312	0.47543
sw14268	0	0	0	0	0	0	2.7128	0	0	2.6875	0	0	0	3.69847	0	0	0	4.78759	0	0	0	0	0	0	0	0	0	0	5.40812	0	2.70656	0	0	0	0	0	4.25834	5.00365
sw03214	0	0	0	0	0	0	0	0	0	0	0	0	2.46074	0	0	7.96575	11.9668	7.51746	7.69178	0	0	0	0	0	0	0	0	0	0	0	0	4.62493	10.093	0	15.6783	17.883	8.34564	14.0993
sw19768	0	0	0	0	0	0	0	0	0	0	0	0	0	0	0	0	0	0	8.65124	0	0	4.31459	0	0	0	0	0	0	0	0	0	0	0	0	0	0	0	0
sw09049	0.316925	0.262306	0	0	0.0472586	0.206835	0.0940833	0.0680334	0.0857869	0.572644	0.147028	0.072726	0.245846	0.577175	0.0844119	0.841089	0.192857	0.820427	1.11096	0.209544	0	0	0	0.0496695	0.140537	0.151267	0.225904	0.378163	0.391732	0.132018	0.269369	0.398492	0.665499	0.218886	0.9655	1.22325	1.3021	0.128719
sw03497	0	0	0	0	0	0	0	0	0	0	0	0	0	0	0	0	0	4.22856	5.48334	0	0	0	0	0	0	0	0	0	0	0	0	0	0	0	0	0	2.524	0
sw19525	0	0	0	0	0	0	0	0	0	3.7816	0	0	0	3.34567	0	0	0	3.21134	7.96774	0	0	0	0	0	0	0	4.41516	2.93998	4.16106	0	0	3.20945	7.10088	0	0	0	4.93165	5.76616
sw22610	0.95339	0.975887	0.155275	0.162599	0.702777	0.835016	1.27492	1.24757	1.66994	1.78396	1.75001	10.9237	1.73613	2.07016	8.09946	2.61431	0	2.50966	4.55409	1.0949	1.0214	1.10285	0.130336	0.734504	0.932752	1.21676	1.08355	1.76098	1.70679	6.40458	1.96473	1.9343	1.946	5.73041	1.95146	6.30702	1.06947	1.19161
sw15735	0.701059	0.0991492	0.870055	1.27299	6.76019	1.25151	1.90864	14.2192	0.167828	2.26658	3.45551	2.83522	2.24613	2.42949	2.55806	2.5911	2.87301	3.17893	3.70941	0.92988	0.808445	0.943124	0.991435	0.589058	0.991687	1.41093	1.82152	1.30917	1.311	11.8182	2.55144	2.662	1.86271	1.93083	1.94841	1.45243	1.23459	1.49647
sw12886	0	0	0	0	0	0	0	0	0	4.60665	0	0	4.14078	9.33465	4.78618	0	0	4.89828	18.0697	0	0	0	0	0	0	0	0	2.24889	3.28657	0	0	0	5.92225	0	0	0	0	8.56599
sw12060	0.732699	0.830744	0.20176	1.02703	0.677851	0	0.251271	1.26876	6.63618	1.44497	5.09146	0	0	1.23365	0	2.6587	10.011	2.75693	2.50354	1.08452	1.17812	0.17053	0.226308	0.615173	0	1.0101	0.956415	1.53254	1.65161	0	1.03669	1.37984	1.73146	0	0	6.15797	1.55285	1.87834
sw15370	0	2.86871	0	0	2.31258	0	0	0	43.454	13.1026	0	0	4.47895	6.27682	0	0	15.8911	8.31706	8.48246	0	0	4.37765	0	3.27469	0	3.2416	5.34625	43.4314	16.7822	7.13777	4.98943	5.45079	6.55264	0	0	17.7054	0	0
sw11783	0	0	0	0	0	0	0	0	0	2.25539	0	0	2.55869	3.33373	0	0	0	0	7.84129	0	0	0	0	0	0	0	0	0	0	0	0	2.51968	0	0	0	0	0	0
sw00778	0	0	0	4.84893	0	3.58167	0	0	0	4.53602	0	0	2.14498	0	0	0	0	0	0	0	0	0	0	0	0	2.60175	0	3.08369	3.30129	0	0	0	0	0	0	0	4.6691	0
sw15283	0	0	0	0	0	0	0	0	0	0	0	0	2.89822	4.81737	0	4.08379	0	3.47365	12.2625	0	0	0	0	0	0	2.65401	0	0	2.59044	0	0	0	0	0	0	0	0	4.88957
sw04416	0	0	0	0	0	0	0	0	0	0	0	0	0	0	0	0	0	5.36658	0	0	0	0	0	0	0	0	0	0	0	0	0	0	3.26953	0	0	0	9.96316	4.08495
sw09854	0	0	0	0	0	0	0	0	0	2.49023	0	0	2.21419	0	0	0	0	3.17613	7.72541	0	0	0	0	0	0	0	2.89377	3.41882	4.30913	0	0	0	2.96405	0	0	0	0	0
sw12065	0.890977	1.0156	1.3266	1.63747	0.726235	3.07009	3.01152	1.60828	1.51214	2.24449	0.988003	0.108232	0.569466	0.331889	0.126791	0.136075	0.111693	0.0889202	0.572379	0.967228	0.81835	0.774387	0.846817	1.10258	2.66472	1.95427	1.24765	0.904216	0.933237	0	0.649403	0.646458	0.597501	0.130529	0.120164	0.157767	0.365461	0.445757
sw07599	6.40101	3.17782	7.95439	0	4.6522	0	0	0	0	0	0	0	0	0	0	0	0	0	0	0	4.82932	15.5262	5.02856	3.47086	0	0	0	0	0	0	0	0	0	0	0	0	0	0
sw12607	0.0438698	0.767187	0.875073	1.02645	0.552429	0.538669	0.784822	0.791709	1.11934	1.46072	1.07493	1.12729	0.916254	1.40935	0.869193	1.1295	1.44411	1.4708	3.0432	1.01339	1.02297	0.916644	0.881439	0.578222	8.66663	0.689373	0.893805	1.07207	1.58515	1.1209	1.06674	1.23516	1.503	1.28088	1.54198	1.62852	1.10369	2.36492
sw13937	0	0	0	0	0	0	0	0	0	0	0	0	0	0	0	0	0	0	4.33016	0	0	0	0	0	0	0	0	0	0	0	0	0	0	0	0	0	3.35752	0
sw00098	1.24455	1.13325	1.78079	1.59798	1.16109	1.12997	1.19062	0.598894	1.40761	1.02295	1.67543	0.80034	0.698827	0.574658	0.757266	0.694004	0.668194	0.79203	0.546587	1.21645	1.67741	1.46652	1.8411	1.41061	1.08391	1.37354	0.683728	1.24722	0.937682	1.25056	1.11448	1.08062	0.964499	1.15935	1.14296	1.05506	1.16337	0.930788
sw20450	2.57802	0	0	0	0	0	0	0	0	0	0	0	0	0	0	0	0	0	0	3.8535	4.15341	0	0	0	0	0	0	0	0	0	0	0	0	0	0	0	0	0
sw10495	0.880965	0.782555	0	0	0.669199	0.914662	1.05331	0	1.28118	1.20839	7.80523	1.53986	1.81197	2.17259	9.36377	8.81254	3.07131	4.36122	0	1.25755	0.871312	0	0	0	0.964943	1.08564	5.11976	1.58036	1.37689	4.9347	6.39251	1.67427	1.9018	5.61382	0	0	0	1.06996
sw12459	0	0	0	0	0	0	0	0	0	0	0	0	0	0	0	0	0	6.06623	10.9843	0	0	0	0	0	0	0	0	0	2.29978	0	0	0	0	0	0	0	2.68624	0
sw19063	4.15761	4.45441	0	0	3.12576	0	0	0	0	0	0	0	0	0	0	0	0	0	0	0	3.83451	5.04638	0	0	0	0	0	0	0	0	0	0	0	0	0	0	0	0
sw12303	0.389882	0.945476	5.50741	0	1.30686	1.956	1.41074	0	10.5378	2.06162	2.38548	1.91301	2.12836	3.96005	12.7565	14.1991	11.3987	5.27371	6.70307	3.61994	4.41964	6.02503	0	1.39763	0	1.64526	2.0265	2.64232	9.56251	7.27142	9.39545	2.37292	2.32071	2.92548	2.6251	2.236	0	3.30121
sw05042	3.27327	4.84633	0	0	0	0	3.56846	0	0	3.53195	0	0	4.73893	0	0	0	0	0	0	3.79256	8.38789	5.50869	0	0	0	0	0	0	2.42438	0	3.28541	4.41762	4.48748	0	0	0	0	0
sw10835	0	0	0	0	2.65285	0	0	0	6.06295	5.02946	0	0	3.3314	3.38098	0	0	4.24434	3.73748	8.03713	0	0	0	0	0	0	0	4.1013	4.61306	5.52053	0	4.00031	3.02387	8.3442	0	9.83198	6.74599	5.14684	5.33807
sw10055	0	0	0	0	0	2.3361	4.33758	0	0	6.00581	5.89237	0	6.02721	6.32115	5.40372	4.74551	4.57833	3.8641	15.2849	0	0	0	0	0	3.37612	3.90077	3.03203	4.02161	4.955	0	0	3.66	3.79928	0	0	0	0	4.80974
sw12833	0	0	4.3875	0	0	0	3.03266	0	0	5.39801	0	0	2.40181	3.96907	0	0	0	0	0	0	0	0	0	0	0	2.63207	3.7922	0	0	0	3.5475	3.9344	0	0	0	0	0	0
sw13190	0	0	0	0	0	0	0	0	0	0	0	0	2.23719	0	0	0	0	0	6.40223	0	0	0	0	0	0	0	0	0	0	0	0	2.62736	0	0	0	0	0	0
sw18761	0	0	0	0	0	0	5.63265	0	0	0	0	0	5.41468	6.9145	0	0	0	2.75236	9.3752	0	0	0	0	0	0	2.86673	5.4307	3.3865	3.69355	0	4.98749	4.60077	0	0	0	0	0	4.38253
sw07932	0	0	0	0	0	0	0	0	0	0	0	0	0	0	0	0	0	0	9.10842	0	0	0	0	0	0	0	0	0	2.53173	0	0	0	6.281	0	0	0	0	0
sw18345	3.08415	0	0	0	0	0	0	0	0	0	0	0	0	3.04707	0	0	0	4.43883	5.62	0	4.92909	5.16383	0	0	0	0	0	0	0	0	0	0	0	0	0	0	4.206	0
sw18021	0	0	0	0	0	0	0	0	0	0	0	0	0	3.13608	0	0	0	0	5.22184	0	0	0	0	0	0	0	0	2.38849	0	0	0	0	0	0	0	0	0	0
sw18896	2.28466	2.41998	6.88494	1.09711	0.681518	1.02055	1.02751	11.3086	5.44871	2.35269	1.2445	0.984599	0.963187	1.33139	1.49836	2.39376	3.83026	1.5937	2.20037	2.37736	1.55358	2.7892	2.00604	0.844329	1.58285	1.05601	1.34601	5.52004	1.82371	1.32903	1.01828	1.04066	1.22792	1.15721	2.49603	4.65558	1.30498	2.8769
sw12894	0	0	0	0	0	0	0	0	0	0	0	0	0	0	0	0	0	0	5.2314	0	0	0	0	0	0	0	0	0	2.36487	0	0	0	5.01491	0	0	0	0	0
sw05352	0	0	0	0	0	0	0	0	0	0	0	0	0	4.2505	0	0	0	0	0	0	0	0	0	0	0	0	0	2.80477	0	0	0	0	4.03314	0	0	0	0	0
sw21054	0	0	0	0	0	0	0	0	0	3.13856	0	0	0	3.5428	0	0	0	0	5.26258	0	0	0	0	0	0	0	0	0	2.65968	0	3.11187	3.21078	0	0	0	0	0	0
sw20989	0	0	0	0	0	0	3.7171	0	0	3.29977	0	0	3.4191	5.83318	0	4.20933	0	0	6.73686	0	0	0	0	0	0	2.23716	0	0	0	0	2.92717	4.43689	0	0	0	0	0	0
sw11425	0	0	0	0	0	0	5.11847	0	6.901	8.28999	6.54692	0	4.26533	5.52721	0	0	4.56666	0	8.9119	0	0	0	0	0	0	4.83152	4.28751	5.52213	6.90407	5.39185	5.4582	5.9335	6.38224	0	0	0	5.61464	8.42514
sw05457	0	0	0	0	0	0	0	0	0	0	0	0	0	3.76034	0	0	0	0	0	0	0	0	0	0	0	0	0	0	0	0	0	0	0	0	0	4.71983	0	0
sw01969	2.37433	0	0	0	0	0	0	0	0	3.17011	0	0	0	3.44653	0	0	0	9.00547	5.59828	0	0	0	0	0	0	0	0	3.36192	2.61582	0	0	0	0	0	0	0	7.29519	0
sw15637	0	0	0	0	0	0	0	0	0	0	0	0	0	3.22301	0	0	0	0	8.28237	0	0	0	0	0	0	0	0	0	0	0	0	3.26435	4.07303	0	0	0	0	0
sw14107	0.399796	0.0815095	0.103126	0.131116	0.448883	0.691098	0.771696	0	0.893657	1.0545	0.9957	0.979396	0.71522	0.0724984	0.114736	0.538767	0.167679	0.262467	0.542151	0.53495	0.372993	0.0974214	0.421219	0.344538	0.849757	0.652499	0.754702	1.04873	0.879456	0.89659	0.964269	0.90448	0.95817	0.159906	0.929461	0.876692	0	0.771073
sw01846	0	0	0	0	0	0	0	0	0	0	0	0	0	0	0	0	0	4.55249	0	0	3.75486	6.44703	0	0	0	0	3.05221	3.17934	5.26275	5.42424	6.50021	7.25841	7.07797	0	0	0	6.83611	7.11196
sw16323	5.73263	10.4685	0	9.9333	0	0	0	0	0	2.5825	0	0	3.23924	5.65621	4.92525	4.16655	4.0584	0	12.9997	4.98108	0	8.72716	9.88866	0	3.33123	4.16989	0	2.33801	3.2569	0	0	3.11151	4.54247	0	0	0	0	0

## Sheet: Cluster 1-7
Cluster1	sw14296	sw20191	sw19768	sw11783	sw14630	sw06571	sw12886	sw15283	sw10055	sw07932	sw18021	sw12894	sw15637	sw16323	sw19525	sw07669	sw06109	sw12336	sw13930	sw20816	sw09854	sw12459	sw13190	sw12313	sw10738	sw03497	sw13937	sw06411	sw12607	sw20989	sw11409	sw06234	sw22207	sw12833	sw18761	sw05352	sw05457	sw21054
Cluster2	sw06538	sw15735	sw10495	sw14931	sw19719	sw12060	sw12303
Cluster3	sw07023	sw09049	sw07599	sw19063	sw18675	sw00098	sw20450	sw05042	sw18345
Cluster4	sw14441	sw03214	sw10835	sw05306	sw14107	sw15859	sw11425	sw08394
Cluster5	sw22610	sw01846	sw17253
Cluster6	sw15370	sw12065	sw15845	sw18896
Cluster7	sw14970	sw14412	sw07636	sw00770	sw02196	sw14268	sw04416	sw01969	sw08858	sw00778
